# Supplementary material for: Salmonella Typhimurium Type III Secretion Effectors Stimulate Innate Immune Responses in Cultured Epithelial Cells
Source: PubMed Central journal article supplement (PMC2714975; doi:10.1371/journal.ppat.1000538), 2009-08-07
Supplement: ppat.1000538.s006.pdf [file ppat.1000538.s006.pdf]

Table S1: Microarray analysis of the transcriptional responses induced by different strains of *Salmonella* Typhimurium \*

| Probeset     | Gene     | $\Delta$ invA | $\Delta$ invA | effectorless | $\Delta$ sopB/E/E2 | $\Delta$ sopB | $\Delta$ sopB | wild type | wild type | wild type |
|--------------|----------|---------------|---------------|--------------|--------------------|---------------|---------------|-----------|-----------|-----------|
| 206411_s_at  | ABL2     | 1.0           | 0.8           | 1.1          | 1.2                | 1.7           | 2.1           | 4.6       | 3.2       | 2.5       |
| 231907_at    | ABL2     | 0.9           | 1.0           | 1.1          | 1.4                | 2.0           | 1.7           | 3.0       | 2.5       | 2.1       |
| 202912_at    | ADM      | 0.8           | 0.9           | 1.3          | 1.7                | 5.3           | 5.3           | 11.3      | 9.2       | 9.2       |
| 206170_at    | ADRB2    | 0.8           | 1.1           | 1.2          | 1.0                | 2.8           | 2.1           | 4.9       | 2.6       | 2.1       |
| 212543_at    | AIM1     | 2.0           | 2.0           | 1.1          | 1.4                | 5.7           | 3.2           | 2.5       | 7.5       | 7.0       |
| 210517_s_at  | AKAP12   | 0.8           | 1.0           | 1.6          | 1.2                | 1.6           | 1.7           | 4.0       | 2.3       | 2.3       |
| 227529_s_at  | AKAP12   | 0.8           | 0.7           | 1.2          | 0.9                | 1.4           | 2.0           | 2.5       | 2.0       | 2.0       |
| 227530_at    | AKAP12   | 0.9           | 0.9           | 1.4          | 1.0                | 1.7           | 1.9           | 3.7       | 2.5       | 2.8       |
| 227337_at    | ANKRD37  | 0.7           | 1.1           | 1.1          | 1.3                | 2.1           | 2.3           | 4.9       | 2.8       | 2.5       |
| 219496_at    | ANKRD57  | 0.8           | 0.9           | 1.2          | 1.7                | 2.3           | 2.5           | 4.6       | 3.7       | 4.3       |
| 227034_at    | ANKRD57  | 0.9           | 0.9           | 1.1          | 1.5                | 2.5           | 2.6           | 4.3       | 3.7       | 3.7       |
| 205239_at    | AREG     | 0.4           | 0.9           | 1.3          | 4.9                | 12.1          | 14.9          | 24.3      | 16.0      | 17.1      |
| 220382_s_at  | ARHGAP28 | 1.0           | 1.3           | 0.6          | 1.1                | 0.9           | 0.8           | 0.5       | 0.4       | 0.5       |
| 242727_at    | ARL5B    | 1.4           | 0.9           | 0.9          | 1.5                | 2.1           | 1.7           | 2.3       | 2.0       | 2.0       |
| 224797_at    | ARRDC3   | 0.9           | 0.8           | 1.0          | 1.2                | 2.5           | 2.3           | 3.7       | 3.5       | 3.2       |
| 202672_s_at  | ATF3     | 0.8           | 0.8           | 1.1          | 2.6                | 3.7           | 6.1           | 17.1      | 6.5       | 7.0       |
| 1554980_a_at | ATF3     | 1.7           | 1.1           | 0.8          | 1.5                | 1.7           | 2.6           | 5.7       | 2.6       | 3.7       |
| 225557_at    | AXUD1    | 1.0           | 0.6           | 1.2          | 2.3                | 5.3           | 4.0           | 17.1      | 8.6       | 6.5       |
| 225612_s_at  | B3GNT5   | 0.9           | 1.0           | 1.1          | 1.5                | 2.1           | 2.3           | 3.5       | 2.8       | 2.6       |
| 1554835_a_at | B3GNT5   | 1.1           | 1.3           | 1.3          | 1.2                | 2.8           | 2.3           | 3.2       | 2.8       | 3.2       |
| 221485_at    | B4GALT5  | 1.1           | 1.1           | 1.0          | 1.3                | 1.9           | 1.5           | 2.3       | 2.1       | 2.3       |
| 204032_at    | BCAR3    | 1.0           | 1.0           | 1.1          | 1.5                | 1.4           | 1.7           | 3.0       | 2.1       | 2.5       |
| 1557257_at   | BCL10    | 0.9           | 1.2           | 2.3          | 2.3                | 3.5           | 2.0           | 9.2       | 2.8       | 2.0       |
| 204908_s_at  | BCL3     | 1.1           | 1.1           | 1.0          | 2.0                | 3.7           | 2.5           | 3.7       | 4.3       | 2.8       |
| 201169_s_at  | BHLHB2   | 1.1           | 0.9           | 0.9          | 1.1                | 1.9           | 2.5           | 3.7       | 3.7       | 4.0       |
| 201170_s_at  | BHLHB2   | 0.8           | 0.7           | 0.9          | 1.1                | 1.7           | 2.1           | 4.0       | 3.2       | 3.5       |
| 210538_s_at  | BIRC3    | 1.1           | 1.4           | 1.5          | 1.4                | 1.9           | 3.0           | 4.0       | 3.2       | 3.2       |
| 220178_at    | C19ORF28 | 0.9           | 1.2           | 1.4          | 1.7                | 2.6           | 1.7           | 3.0       | 3.0       | 2.1       |
| 1558834_s_at | C1ORF62  | 1.6           | 1.6           | 1.3          | 2.0                | 2.5           | 1.7           | 8.6       | 4.3       | 4.0       |
| 219474_at    | C3ORF52  | 0.7           | 0.9           | 1.5          | 2.5                | 2.1           | 1.9           | 4.3       | 3.2       | 2.3       |
| 1553868_a_at | C5ORF36  | 1.1           | 0.7           | 0.8          | 0.5                | 0.4           | 0.7           | 0.3       | 0.4       | 0.4       |
| 218541_s_at  | C8ORF4   | 0.4           | 1.5           | 0.7          | 0.5                | 3.0           | 3.0           | 3.2       | 3.7       | 3.7       |
| 213596_at    | CASP4    | 1.1           | 1.1           | 0.9          | 1.7                | 1.5           | 3.2           | 4.6       | 2.8       | 3.0       |
| 216598_s_at  | CCL2     | 1.1           | 1.1           | 0.7          | 3.7                | 21.1          | 12.1          | 207.9     | 55.7      | 39.4      |
| 205476_at    | CCL20    | 0.9           | 1.4           | 0.9          | 0.7                | 4.6           | 1.5           | 4.9       | 18.4      | 17.1      |
| 202769_at    | CCNG2    | 1.1           | 0.9           | 0.7          | 0.9                | 0.9           | 0.7           | 0.5       | 0.4       | 0.3       |
| 220046_s_at  | CCNL1    | 0.9           | 1.0           | 0.9          | 1.1                | 1.9           | 1.5           | 3.5       | 2.1       | 2.3       |
| 1555411_a_at | CCNL1    | 1.0           | 1.0           | 1.1          | 1.1                | 1.9           | 1.9           | 3.5       | 2.5       | 2.5       |
| 1555827_at   | CCNL1    | 1.6           | 1.1           | 1.2          | 1.2                | 2.5           | 2.3           | 3.7       | 3.5       | 2.5       |
| 204695_at    | CDC25A   | 0.9           | 1.0           | 1.3          | 1.9                | 1.6           | 1.9           | 2.5       | 2.1       | 2.0       |
| 1555772_a_at | CDC25A   | 1.0           | 0.9           | 1.1          | 1.4                | 1.9           | 2.1           | 2.8       | 2.0       | 2.5       |
| 204677_at    | CDH5     | 1.2           | 1.1           | 1.1          | 1.3                | 1.5           | 2.6           | 2.5       | 2.8       | 2.6       |
| 202284_s_at  | CDKN1A   | 1.1           | 0.8           | 1.1          | 1.6                | 3.7           | 4.0           | 4.0       | 4.9       | 5.3       |
| 203973_s_at  | CEBPD    | 0.9           | 1.2           | 1.1          | 2.8                | 6.5           | 5.3           | 8.6       | 8.6       | 7.5       |
| 213006_at    | CEBPD    | 0.1           | 0.2           | 0.5          | 3.7                | 8.6           | 6.1           | 13.0      | 14.9      | 8.0       |
| 204203_at    | CEBPG    | 0.9           | 1.0           | 1.2          | 1.4                | 1.4           | 1.4           | 2.8       | 2.0       | 2.1       |
| 219270_at    | CHAC1    | 0.2           | 1.1           | 1.1          | 0.9                | 1.7           | 2.1           | 2.3       | 4.6       | 4.0       |
| 228297_at    | CNN3     | 1.1           | 0.9           | 0.9          | 0.9                | 2.0           | 1.7           | 2.3       | 2.3       | 2.3       |
| 207630_s_at  | CREM     | 0.9           | 0.7           | 1.1          | 1.7                | 2.1           | 2.5           | 3.2       | 2.6       | 2.6       |
| 209967_s_at  | CREM     | 0.9           | 0.8           | 1.1          | 1.6                | 2.0           | 2.1           | 3.0       | 2.5       | 3.0       |
| 214508_x_at  | CREM     | 1.1           | 0.8           | 1.1          | 1.5                | 1.9           | 1.7           | 2.8       | 2.6       | 2.0       |
| 209101_at    | CTGF     | 0.6           | 0.6           | 1.4          | 1.6                | 3.5           | 7.0           | 7.0       | 4.9       | 7.5       |
| 209774_x_at  | CXCL2    | 0.7           | 1.1           | 1.4          | 4.0                | 24.3          | 22.6          | 84.4      | 64.0      | 52.0      |
| 1569203_at   | CXCL2    | 4.6           | 6.1           | 3.5          | 1.0                | 39.4          | 10.6          | 21.1      | 24.3      | 10.6      |
| 207850_at    | CXCL3    | 1.5           | 1.0           | 0.7          | 1.3                | 4.9           | 7.5           | 11.3      | 13.0      | 13.0      |
| 212977_at    | CXCR7    | 1.0           | 0.9           | 0.8          | 0.8                | 0.4           | 0.4           | 0.4       | 0.3       | 0.4       |
| 201289_at    | CYR61    | 0.6           | 0.6           | 1.1          | 1.3                | 2.8           | 4.6           | 6.5       | 4.9       | 7.5       |
| 210764_s_at  | CYR61    | 0.9           | 0.8           | 1.1          | 1.3                | 3.2           | 5.3           | 8.0       | 5.3       | 8.6       |
| 231919_at    | DBT      | 1.1           | 0.9           | 0.9          | 0.7                | 0.5           | 0.6           | 0.5       | 0.4       | 0.5       |
| 204602_at    | DKK1     | 0.7           | 0.8           | 1.5          | 1.7                | 4.6           | 4.9           | 4.6       | 3.5       | 4.0       |
| 1557394_at   | DLGAP4   | 1.9           | 1.7           | 1.0          | 1.2                | 1.9           | 1.7           | 2.3       | 2.1       | 3.5       |
| 231297_at    | DOT1L    | 1.0           | 1.1           | 1.1          | 1.1                | 2.1           | 2.0           | 2.0       | 2.8       | 2.1       |
| 201041_s_at  | DUSP1    | 0.7           | 0.7           | 1.1          | 1.7                | 3.0           | 4.0           | 3.5       | 3.7       | 4.6       |
| 201044_x_at  | DUSP1    | 0.9           | 0.7           | 1.0          | 1.6                | 3.2           | 4.0           | 4.6       | 4.3       | 6.1       |

|              |          |      |     |     |     |      |      |      |      |      |
|--------------|----------|------|-----|-----|-----|------|------|------|------|------|
| 204794_at    | DUSP2    | 1.1  | 0.8 | 1.5 | 1.4 | 1.6  | 2.8  | 2.6  | 2.1  | 2.6  |
| 204014_at    | DUSP4    | 0.9  | 0.9 | 1.3 | 1.6 | 2.6  | 3.5  | 4.3  | 3.5  | 3.2  |
| 204015_s_at  | DUSP4    | 0.8  | 0.9 | 1.2 | 1.4 | 2.3  | 2.5  | 3.0  | 2.5  | 2.5  |
| 209457_at    | DUSP5    | 1.1  | 1.0 | 1.1 | 1.7 | 3.5  | 6.5  | 8.6  | 6.5  | 9.8  |
| 208891_at    | DUSP6    | 0.6  | 0.6 | 1.1 | 0.9 | 2.8  | 2.8  | 3.5  | 5.3  | 4.6  |
| 208892_s_at  | DUSP6    | 0.8  | 0.9 | 1.2 | 1.1 | 2.8  | 3.7  | 4.9  | 6.1  | 6.5  |
| 208893_s_at  | DUSP6    | 0.9  | 0.4 | 1.1 | 1.9 | 2.8  | 5.7  | 14.9 | 10.6 | 13.9 |
| 206374_at    | DUSP8    | 2.5  | 0.9 | 0.9 | 1.3 | 1.6  | 4.9  | 2.3  | 3.2  | 7.0  |
| 201693_s_at  | EGR1     | 1.5  | 1.1 | 1.1 | 1.0 | 11.3 | 13.0 | 34.3 | 17.1 | 10.6 |
| 201694_s_at  | EGR1     | 0.7  | 1.4 | 1.3 | 3.5 | 18.4 | 11.3 | 42.2 | 24.3 | 11.3 |
| 227404_s_at  | EGR1     | 1.0  | 1.1 | 1.5 | 4.0 | 17.1 | 18.4 | 34.3 | 18.4 | 18.4 |
| 206115_at    | EGR3     | 3.5  | 1.7 | 0.4 | 0.8 | 3.7  | 8.6  | 4.0  | 4.0  | 10.6 |
| 218696_at    | EIF2AK3  | 1.0  | 1.0 | 1.1 | 1.3 | 2.1  | 2.1  | 3.5  | 2.8  | 2.5  |
| 201303_at    | EIF4A3   | 1.1  | 1.1 | 1.1 | 1.2 | 2.5  | 1.9  | 2.5  | 2.5  | 2.3  |
| 235592_at    | ELL2     | 0.5  | 0.9 | 1.1 | 1.2 | 1.9  | 1.7  | 3.0  | 2.6  | 2.3  |
| 201324_at    | EMP1     | 0.8  | 1.1 | 1.1 | 1.1 | 2.1  | 2.3  | 3.0  | 2.6  | 2.6  |
| 201325_s_at  | EMP1     | 1.0  | 0.8 | 1.1 | 1.1 | 2.1  | 2.1  | 3.0  | 2.3  | 2.8  |
| 242868_at    | EPAS1    | 0.5  | 1.6 | 1.1 | 3.5 | 4.9  | 2.5  | 12.1 | 6.1  | 3.0  |
| 203499_at    | EPHA2    | 1.0  | 0.9 | 1.1 | 1.7 | 3.2  | 3.7  | 5.7  | 5.3  | 6.1  |
| 205767_at    | EREG     | 0.9  | 1.0 | 1.5 | 3.7 | 8.0  | 9.2  | 9.2  | 8.6  | 9.8  |
| 224657_at    | ERRF1    | 0.8  | 0.9 | 1.1 | 1.5 | 3.0  | 4.0  | 6.5  | 6.1  | 6.5  |
| 224454_at    | ETNK1    | 0.9  | 1.4 | 1.4 | 1.6 | 2.3  | 1.9  | 3.2  | 3.0  | 2.0  |
| 1555355_a_at | ETS1     | 11.3 | 1.9 | 1.7 | 2.5 | 1.4  | 17.1 | 3.5  | 2.3  | 16.0 |
| 201328_at    | ETS2     | 1.1  | 0.8 | 0.7 | 1.1 | 1.5  | 1.5  | 3.2  | 2.6  | 2.6  |
| 201329_s_at  | ETS2     | 0.9  | 0.8 | 0.8 | 1.2 | 1.6  | 1.6  | 2.8  | 2.5  | 2.5  |
| 213506_at    | F2RL1    | 1.0  | 0.8 | 0.9 | 1.1 | 3.5  | 3.7  | 7.5  | 4.3  | 5.3  |
| 204363_at    | F3       | 0.7  | 1.0 | 1.2 | 1.5 | 2.5  | 2.8  | 3.5  | 3.5  | 4.6  |
| 227410_at    | FAM43A   | 0.8  | 0.8 | 1.0 | 1.0 | 0.4  | 0.6  | 0.5  | 0.3  | 0.4  |
| 232202_at    | FAM83B   | 1.0  | 1.0 | 1.1 | 1.3 | 2.1  | 2.0  | 3.0  | 2.8  | 3.0  |
| 223240_at    | FBXO8    | 1.0  | 0.8 | 0.9 | 1.0 | 0.8  | 0.8  | 0.5  | 0.4  | 0.5  |
| 205650_s_at  | FGA      | 0.8  | 0.7 | 0.9 | 2.5 | 3.7  | 2.1  | 13.9 | 5.7  | 3.2  |
| 204988_at    | FGB      | 1.6  | 1.2 | 0.6 | 0.1 | 5.3  | 13.9 | 4.3  | 9.2  | 16.0 |
| 204421_s_at  | FGF2     | 1.0  | 1.1 | 1.1 | 1.0 | 1.5  | 1.9  | 2.3  | 2.1  | 2.3  |
| 226621_at    | FGG      | 1.1  | 0.9 | 1.1 | 1.5 | 2.0  | 1.9  | 2.1  | 2.3  | 2.5  |
| 243309_at    | FLJ27352 | 1.1  | 0.9 | 1.1 | 2.0 | 4.0  | 3.7  | 7.5  | 4.6  | 3.7  |
| 229521_at    | FLJ36031 | 1.5  | 0.8 | 1.0 | 1.0 | 1.9  | 1.6  | 4.6  | 2.0  | 2.3  |
| 239331_at    | FLJ43663 | 0.4  | 1.3 | 1.1 | 1.4 | 3.5  | 2.5  | 9.2  | 7.0  | 5.7  |
| 219250_s_at  | FLRT3    | 0.9  | 0.8 | 1.0 | 1.6 | 1.3  | 2.3  | 3.5  | 2.5  | 2.6  |
| 222853_at    | FLRT3    | 0.9  | 0.9 | 1.1 | 1.3 | 1.6  | 1.5  | 2.8  | 2.5  | 2.5  |
| 1559060_a_at | FNIP1    | 0.7  | 1.1 | 0.6 | 0.8 | 2.0  | 2.5  | 7.0  | 3.0  | 2.5  |
| 209189_at    | FOS      | 0.4  | 0.5 | 0.9 | 3.2 | 14.9 | 13.0 | 52.0 | 27.9 | 24.3 |
| 202768_at    | FOSB     | 1.1  | 1.1 | 0.7 | 3.0 | 10.6 | 12.1 | 39.4 | 16.0 | 9.8  |
| 204420_at    | FOSL1    | 0.9  | 0.9 | 1.7 | 2.3 | 4.6  | 6.1  | 13.9 | 7.0  | 6.1  |
| 218880_at    | FOSL2    | 1.1  | 1.2 | 1.1 | 2.0 | 2.1  | 2.3  | 3.0  | 2.5  | 2.5  |
| 225262_at    | FOSL2    | 1.1  | 0.9 | 1.1 | 1.9 | 1.6  | 2.0  | 2.6  | 2.1  | 2.5  |
| 227475_at    | FOXQ1    | 1.1  | 1.1 | 1.1 | 1.4 | 1.9  | 1.9  | 4.9  | 2.8  | 2.8  |
| 213056_at    | FRMD4B   | 1.1  | 1.1 | 1.9 | 2.8 | 3.7  | 6.1  | 21.1 | 7.5  | 9.2  |
| 210220_at    | FZD2     | 1.5  | 1.0 | 0.8 | 0.7 | 0.5  | 0.5  | 0.4  | 0.3  | 0.4  |
| 207574_s_at  | GADD45B  | 0.9  | 0.8 | 1.0 | 0.9 | 2.3  | 2.6  | 9.2  | 5.7  | 5.7  |
| 209304_x_at  | GADD45B  | 0.8  | 0.9 | 0.9 | 0.7 | 2.3  | 2.1  | 6.5  | 4.6  | 5.3  |
| 209305_s_at  | GADD45B  | 0.8  | 1.1 | 0.9 | 0.9 | 2.5  | 1.5  | 7.5  | 4.6  | 4.0  |
| 213560_at    | GADD45B  | 1.1  | 1.1 | 1.1 | 0.9 | 3.2  | 6.1  | 17.1 | 12.1 | 14.9 |
| 204457_s_at  | GAS1     | 1.1  | 0.8 | 0.8 | 0.6 | 0.4  | 0.4  | 0.3  | 0.3  | 0.3  |
| 219508_at    | GCNT3    | 1.1  | 1.1 | 1.2 | 1.2 | 1.9  | 2.1  | 2.8  | 3.2  | 2.3  |
| 221577_x_at  | GDF15    | 1.0  | 0.9 | 0.9 | 2.6 | 3.5  | 4.3  | 3.2  | 5.7  | 4.9  |
| 204472_at    | GEM      | 1.1  | 0.8 | 1.3 | 2.8 | 16.0 | 21.1 | 59.7 | 27.9 | 27.9 |
| 205100_at    | GFPT2    | 1.4  | 1.4 | 1.1 | 1.1 | 2.1  | 1.5  | 2.6  | 3.5  | 2.3  |
| 204222_s_at  | GLIPR1   | 0.7  | 1.0 | 1.4 | 1.1 | 1.6  | 1.4  | 6.5  | 3.2  | 3.0  |
| 226136_at    | GLIPR1   | 1.1  | 0.9 | 0.9 | 0.6 | 1.4  | 1.7  | 3.2  | 3.0  | 2.0  |
| 226142_at    | GLIPR1   | 0.8  | 0.8 | 2.1 | 1.7 | 1.2  | 1.5  | 3.7  | 2.1  | 2.6  |
| 223079_s_at  | GLS      | 1.1  | 1.0 | 1.2 | 1.6 | 2.3  | 2.6  | 2.6  | 2.5  | 2.6  |
| 219936_s_at  | GPR87    | 1.0  | 1.0 | 1.4 | 1.7 | 6.1  | 5.3  | 4.0  | 4.9  | 5.3  |
| 203108_at    | GPRC5A   | 0.9  | 0.9 | 1.3 | 1.4 | 2.5  | 2.6  | 2.1  | 2.3  | 2.6  |
| 232290_at    | GPRC5A   | 0.8  | 1.2 | 1.7 | 2.5 | 3.0  | 1.7  | 5.3  | 3.7  | 2.6  |
| 218706_s_at  | GRAMD3   | 0.9  | 1.0 | 1.0 | 1.1 | 1.7  | 1.9  | 2.0  | 2.0  | 2.0  |
| 212434_at    | GRPEL1   | 1.0  | 1.0 | 1.1 | 1.6 | 1.6  | 1.7  | 2.3  | 2.0  | 2.0  |
| 223541_at    | HAS3     | 1.6  | 0.4 | 3.0 | 3.0 | 1.4  | 2.3  | 4.6  | 2.3  | 3.7  |

|              |           |     |      |     |      |      |      |      |      |      |
|--------------|-----------|-----|------|-----|------|------|------|------|------|------|
| 1557169_x_at | HCG11     | 0.9 | 1.1  | 1.1 | 1.2  | 0.7  | 0.6  | 0.5  | 0.3  | 0.5  |
| 232026_at    | HERC4     | 0.9 | 1.1  | 1.6 | 1.2  | 1.7  | 2.6  | 3.0  | 2.0  | 2.3  |
| 203394_s_at  | HES1      | 0.9 | 1.2  | 1.3 | 1.6  | 3.5  | 3.0  | 9.8  | 4.0  | 3.0  |
| 218839_at    | HEY1      | 1.1 | 1.0  | 0.8 | 0.5  | 0.2  | 0.2  | 0.4  | 0.3  | 0.3  |
| 202934_at    | HK2       | 0.9 | 1.0  | 1.1 | 1.5  | 1.7  | 1.6  | 2.8  | 2.1  | 2.0  |
| 205579_at    | HRH1      | 0.9 | 1.1  | 1.5 | 1.6  | 2.5  | 2.3  | 4.6  | 2.8  | 2.8  |
| 221667_s_at  | HSPB8     | 1.1 | 0.9  | 1.2 | 1.1  | 1.5  | 1.9  | 3.5  | 2.3  | 2.1  |
| 208937_s_at  | ID1       | 0.9 | 1.0  | 1.1 | 1.6  | 7.5  | 6.5  | 9.2  | 13.9 | 10.6 |
| 201631_s_at  | IER3      | 0.8 | 1.2  | 1.1 | 1.9  | 4.0  | 3.7  | 4.9  | 4.9  | 4.6  |
| 218611_at    | IER5      | 0.9 | 1.1  | 1.1 | 1.3  | 2.1  | 2.3  | 3.7  | 2.5  | 2.6  |
| 206332_s_at  | IFI16     | 1.1 | 1.1  | 0.9 | 1.1  | 2.0  | 2.0  | 3.0  | 2.8  | 3.0  |
| 208966_x_at  | IFI16     | 1.1 | 1.1  | 1.0 | 1.1  | 2.1  | 2.0  | 3.0  | 2.8  | 2.8  |
| 205302_at    | IGFBP1    | 1.3 | 1.1  | 0.9 | 1.7  | 7.5  | 7.0  | 7.0  | 9.2  | 8.0  |
| 206924_at    | IL11      | 0.5 | 1.0  | 0.9 | 1.4  | 5.3  | 13.0 | 8.0  | 6.1  | 12.1 |
| 210118_s_at  | IL1A      | 0.5 | 0.5  | 0.7 | 1.5  | 1.5  | 6.5  | 4.9  | 5.3  | 9.8  |
| 202948_at    | IL1R1     | 1.5 | 0.8  | 1.0 | 1.2  | 3.0  | 3.5  | 3.7  | 4.3  | 4.9  |
| 203233_at    | IL4R      | 1.0 | 0.9  | 1.4 | 1.3  | 1.7  | 1.9  | 2.5  | 2.0  | 2.3  |
| 202859_x_at  | IL8       | 1.6 | 1.3  | 0.8 | 1.7  | 3.7  | 9.2  | 36.8 | 9.2  | 16.0 |
| 211506_s_at  | IL8       | 2.0 | 1.1  | 0.9 | 1.0  | 2.8  | 6.5  | 11.3 | 7.5  | 21.1 |
| 1557174_a_at | IRAK1BP1  | 0.9 | 0.9  | 0.7 | 0.7  | 0.6  | 0.5  | 0.4  | 0.5  | 0.5  |
| 202531_at    | IRF1      | 1.0 | 1.1  | 1.1 | 1.2  | 1.9  | 1.5  | 3.0  | 2.6  | 2.3  |
| 204698_at    | ISG20     | 4.6 | 1.1  | 1.1 | 1.0  | 5.7  | 7.0  | 6.1  | 8.6  | 4.3  |
| 219361_s_at  | ISG20L1   | 0.8 | 0.9  | 1.1 | 2.0  | 2.5  | 2.8  | 3.0  | 2.8  | 2.5  |
| 205032_at    | ITGA2     | 1.0 | 1.0  | 1.4 | 0.9  | 1.1  | 2.0  | 3.2  | 2.3  | 3.5  |
| 227314_at    | ITGA2     | 0.9 | 0.8  | 0.9 | 0.8  | 1.5  | 2.1  | 4.0  | 3.0  | 4.3  |
| 213146_at    | JMJD3     | 0.6 | 1.4  | 1.4 | 1.4  | 3.2  | 1.5  | 5.3  | 4.6  | 2.6  |
| 212723_at    | JMJD6     | 1.0 | 1.1  | 1.1 | 1.5  | 1.7  | 1.7  | 2.6  | 2.1  | 2.1  |
| 226352_at    | JMY       | 0.9 | 1.0  | 1.0 | 1.1  | 0.8  | 0.7  | 0.5  | 0.5  | 0.4  |
| 243446_at    | JUB       | 1.1 | 2.8  | 1.6 | 1.7  | 5.7  | 4.3  | 3.2  | 9.8  | 10.6 |
| 201464_x_at  | JUN       | 1.0 | 1.2  | 1.2 | 2.6  | 8.0  | 10.6 | 34.3 | 17.1 | 21.1 |
| 201465_s_at  | JUN       | 0.7 | 1.2  | 1.0 | 12.1 | 9.2  | 19.7 | 84.4 | 11.3 | 29.9 |
| 201466_s_at  | JUN       | 0.9 | 0.9  | 0.9 | 2.6  | 5.3  | 4.3  | 24.3 | 11.3 | 12.1 |
| 213281_at    | JUN       | 0.5 | 1.1  | 1.0 | 2.0  | 2.5  | 5.7  | 11.3 | 4.3  | 7.0  |
| 201473_at    | JUNB      | 1.2 | 0.9  | 1.1 | 2.5  | 5.7  | 4.9  | 9.8  | 7.0  | 6.5  |
| 228325_at    | KIAA0146  | 0.7 | 0.4  | 1.1 | 4.3  | 5.3  | 5.3  | 14.9 | 8.0  | 8.0  |
| 202386_s_at  | KIAA0430  | 0.9 | 1.0  | 1.0 | 0.9  | 0.6  | 0.5  | 0.4  | 0.4  | 0.4  |
| 225582_at    | KIAA1754  | 0.8 | 1.0  | 1.1 | 1.5  | 2.6  | 2.1  | 3.2  | 3.0  | 2.5  |
| 225193_at    | KIAA1967  | 0.8 | 1.0  | 0.9 | 0.7  | 0.4  | 0.5  | 0.5  | 0.5  | 0.4  |
| 219371_s_at  | KLF2      | 1.1 | 0.8  | 0.8 | 0.8  | 1.2  | 1.5  | 4.3  | 2.1  | 2.1  |
| 209212_s_at  | KLF5      | 1.1 | 1.1  | 1.1 | 1.6  | 2.6  | 2.8  | 2.6  | 2.6  | 2.8  |
| 208960_s_at  | KLF6      | 1.5 | 0.3  | 1.3 | 1.4  | 3.0  | 5.7  | 11.3 | 7.0  | 12.1 |
| 208961_s_at  | KLF6      | 1.1 | 1.3  | 1.1 | 1.6  | 3.7  | 3.2  | 12.1 | 8.6  | 9.8  |
| 224606_at    | KLF6      | 0.7 | 0.8  | 0.8 | 1.5  | 3.5  | 3.7  | 12.1 | 8.6  | 9.2  |
| 1555832_s_at | KLF6      | 0.6 | 0.7  | 0.9 | 1.2  | 3.5  | 3.5  | 12.1 | 7.5  | 8.6  |
| 226158_at    | KLHL24    | 1.0 | 1.1  | 1.1 | 1.3  | 0.6  | 0.6  | 0.4  | 0.3  | 0.2  |
| 205157_s_at  | KRT17     | 1.0 | 1.0  | 1.5 | 2.0  | 2.6  | 2.6  | 3.7  | 3.2  | 3.5  |
| 212236_x_at  | KRT17     | 0.9 | 1.1  | 1.4 | 1.9  | 2.6  | 2.3  | 3.7  | 3.0  | 3.0  |
| 202067_s_at  | LDLR      | 1.0 | 0.8  | 0.9 | 0.9  | 1.5  | 1.9  | 2.3  | 2.5  | 3.2  |
| 202068_s_at  | LDLR      | 0.8 | 0.7  | 0.8 | 0.9  | 1.6  | 1.7  | 2.6  | 2.6  | 2.8  |
| 217173_s_at  | LDLR      | 0.8 | 0.7  | 1.1 | 1.1  | 1.5  | 1.1  | 2.6  | 2.5  | 2.0  |
| 207170_s_at  | LETMD1    | 1.1 | 1.1  | 0.9 | 0.9  | 0.7  | 0.7  | 0.5  | 0.5  | 0.5  |
| 242424_at    | LETMD1    | 0.4 | 0.9  | 0.9 | 0.7  | 0.4  | 0.4  | 0.4  | 0.4  | 0.1  |
| 228762_at    | LFNG      | 1.1 | 1.6  | 0.6 | 0.3  | 0.4  | 0.4  | 0.1  | 0.3  | 0.1  |
| 214045_at    | LIAS      | 0.8 | 1.0  | 0.9 | 0.8  | 0.5  | 0.6  | 0.4  | 0.4  | 0.5  |
| 205266_at    | LIF       | 0.9 | 1.2  | 1.3 | 0.9  | 1.5  | 1.4  | 4.3  | 2.0  | 2.0  |
| 241140_at    | LMO7      | 0.5 | 1.9  | 1.0 | 1.0  | 2.3  | 1.5  | 4.6  | 2.1  | 2.1  |
| 1556377_s_at | LMO7      | 0.1 | 11.3 | 1.4 | 3.5  | 19.7 | 1.7  | 8.0  | 32.0 | 2.0  |
| 231828_at    | LOC253039 | 1.1 | 0.9  | 0.8 | 0.7  | 0.5  | 0.5  | 0.5  | 0.5  | 0.5  |
| 236076_at    | LOC257396 | 1.0 | 0.8  | 0.6 | 0.4  | 0.6  | 0.6  | 0.2  | 0.4  | 0.1  |
| 235151_at    | LOC283357 | 0.9 | 1.1  | 0.7 | 0.8  | 0.7  | 0.6  | 0.4  | 0.3  | 0.4  |
| 1556064_at   | LOC284926 | 0.8 | 0.7  | 0.8 | 0.5  | 0.4  | 0.4  | 0.4  | 0.3  | 0.3  |
| 222662_at    | LOC286044 | 1.1 | 1.0  | 1.0 | 1.2  | 1.3  | 1.2  | 4.9  | 3.5  | 2.1  |
| 227940_at    | LOC339803 | 0.9 | 0.8  | 0.7 | 0.6  | 0.5  | 0.3  | 0.4  | 0.5  | 0.4  |
| 243009_at    | LOC441242 | 0.8 | 0.9  | 0.9 | 0.5  | 0.3  | 0.5  | 0.5  | 0.4  | 0.4  |
| 226977_at    | LOC492311 | 0.9 | 0.9  | 0.8 | 0.8  | 0.5  | 0.5  | 0.3  | 0.4  | 0.4  |
| 241874_at    | LOC492311 | 0.9 | 1.1  | 0.9 | 0.7  | 0.5  | 0.7  | 0.3  | 0.5  | 0.4  |
| 220770_s_at  | LOC63920  | 1.1 | 1.0  | 0.9 | 0.7  | 0.7  | 0.5  | 0.3  | 0.5  | 0.4  |

|              |           |     |     |     |     |     |      |      |      |      |
|--------------|-----------|-----|-----|-----|-----|-----|------|------|------|------|
| 242396_at    | LOC644192 | 0.6 | 1.4 | 1.0 | 0.4 | 0.4 | 0.1  | 0.4  | 0.5  | 0.1  |
| 1555978_s_at | LOC727918 | 0.9 | 1.2 | 1.1 | 0.8 | 1.5 | 1.6  | 2.0  | 2.0  | 2.0  |
| 217122_s_at  | LOC728661 | 1.0 | 1.0 | 0.9 | 0.8 | 0.5 | 0.6  | 0.5  | 0.5  | 0.5  |
| 239343_at    | LOC728705 | 0.9 | 0.9 | 0.9 | 0.6 | 0.4 | 0.4  | 0.4  | 0.4  | 0.4  |
| 228536_at    | LOC90826  | 0.9 | 1.1 | 1.4 | 1.9 | 3.2 | 2.1  | 3.7  | 2.8  | 2.3  |
| 223533_at    | LRRRC8C   | 1.1 | 1.1 | 1.2 | 1.5 | 2.6 | 2.5  | 3.0  | 2.5  | 2.3  |
| 218559_s_at  | MAFB      | 0.1 | 8.6 | 0.5 | 0.6 | 9.8 | 0.9  | 5.7  | 18.4 | 4.3  |
| 205193_at    | MAFF      | 1.7 | 0.9 | 1.7 | 3.5 | 4.9 | 7.5  | 8.6  | 6.5  | 6.5  |
| 36711_at     | MAFF      | 0.9 | 1.2 | 1.3 | 3.2 | 6.1 | 5.7  | 8.0  | 7.0  | 7.0  |
| 206750_at    | MAFK      | 1.2 | 1.2 | 1.1 | 1.7 | 1.7 | 2.1  | 3.5  | 2.3  | 2.0  |
| 226206_at    | MAFK      | 0.9 | 0.9 | 1.2 | 2.5 | 3.5 | 3.0  | 4.6  | 3.7  | 3.2  |
| 224480_s_at  | MAG1      | 0.9 | 0.9 | 0.9 | 1.1 | 2.1 | 2.5  | 2.0  | 2.3  | 2.6  |
| 205027_s_at  | MAP3K8    | 0.9 | 0.8 | 1.1 | 2.1 | 2.8 | 3.7  | 6.5  | 4.0  | 4.9  |
| 235421_at    | MAP3K8    | 1.3 | 1.5 | 0.9 | 0.9 | 1.9 | 2.3  | 2.8  | 2.0  | 3.5  |
| 236067_at    | MBNL2     | 0.8 | 1.0 | 1.3 | 1.1 | 1.9 | 1.5  | 4.9  | 3.0  | 2.6  |
| 236699_at    | MBNL2     | 0.9 | 1.1 | 0.9 | 1.1 | 2.5 | 1.7  | 7.5  | 4.9  | 4.3  |
| 200796_s_at  | MCL1      | 1.1 | 1.1 | 1.1 | 1.7 | 2.8 | 3.0  | 5.3  | 4.0  | 4.3  |
| 200797_s_at  | MCL1      | 1.0 | 1.1 | 1.1 | 1.6 | 2.5 | 2.5  | 3.5  | 2.8  | 3.2  |
| 200798_x_at  | MCL1      | 0.9 | 1.0 | 1.2 | 1.6 | 2.5 | 2.5  | 3.7  | 3.0  | 3.5  |
| 214056_at    | MCL1      | 0.8 | 1.1 | 1.1 | 1.4 | 2.5 | 3.0  | 5.7  | 3.5  | 4.0  |
| 214057_at    | MCL1      | 1.0 | 1.1 | 1.3 | 1.6 | 2.0 | 2.5  | 3.0  | 2.8  | 3.0  |
| 227175_at    | MCL1      | 1.2 | 1.1 | 0.8 | 1.1 | 1.7 | 1.9  | 2.5  | 2.3  | 2.5  |
| 212830_at    | MEGF9     | 0.8 | 0.8 | 0.9 | 0.9 | 0.7 | 0.7  | 0.5  | 0.4  | 0.4  |
| 214696_at    | MGC14376  | 0.9 | 0.9 | 1.3 | 2.0 | 2.1 | 2.5  | 6.1  | 3.2  | 3.0  |
| 221477_s_at  | MGC5618   | 1.5 | 1.7 | 1.4 | 2.1 | 2.8 | 2.5  | 3.2  | 3.2  | 2.8  |
| 239549_at    | M-RIP     | 0.6 | 1.0 | 1.1 | 1.0 | 2.0 | 1.6  | 3.0  | 2.3  | 2.1  |
| 1570588_at   | M-RIP     | 0.8 | 1.7 | 0.9 | 1.5 | 2.0 | 1.6  | 3.0  | 3.2  | 2.5  |
| 217165_x_at  | MT1F      | 1.0 | 1.2 | 1.1 | 1.0 | 1.9 | 1.9  | 2.0  | 2.1  | 2.6  |
| 211456_x_at  | MT1P2     | 1.0 | 1.2 | 1.2 | 1.1 | 1.6 | 1.7  | 2.1  | 2.3  | 2.6  |
| 204326_x_at  | MT1X      | 1.1 | 1.1 | 1.1 | 1.1 | 1.5 | 1.9  | 2.1  | 2.0  | 2.5  |
| 208581_x_at  | MT1X      | 1.0 | 1.1 | 1.2 | 1.1 | 1.6 | 2.0  | 2.5  | 2.3  | 2.8  |
| 212185_x_at  | MT2A      | 1.1 | 1.2 | 1.1 | 1.0 | 1.7 | 1.9  | 2.1  | 2.3  | 2.6  |
| 225344_at    | NCOA7     | 1.1 | 1.1 | 0.9 | 1.4 | 2.0 | 1.9  | 2.1  | 2.3  | 2.3  |
| 203574_at    | NFIL3     | 1.0 | 0.8 | 0.7 | 1.5 | 3.0 | 2.6  | 5.3  | 4.6  | 3.7  |
| 201502_s_at  | NFKBIA    | 1.2 | 1.1 | 1.1 | 1.5 | 1.3 | 1.6  | 4.6  | 2.1  | 2.6  |
| 223217_s_at  | NFKBIZ    | 1.4 | 1.0 | 1.5 | 2.6 | 4.0 | 6.1  | 18.4 | 5.7  | 8.6  |
| 223218_s_at  | NFKBIZ    | 0.8 | 1.1 | 1.5 | 3.7 | 5.7 | 4.9  | 18.4 | 7.5  | 7.0  |
| 202585_s_at  | NFX1      | 1.1 | 0.9 | 0.8 | 0.8 | 0.7 | 0.6  | 0.3  | 0.5  | 0.5  |
| 202237_at    | NNMT      | 1.0 | 1.0 | 0.9 | 1.3 | 2.8 | 2.0  | 2.5  | 3.0  | 2.8  |
| 202238_s_at  | NNMT      | 0.9 | 1.1 | 1.1 | 1.5 | 3.0 | 2.1  | 2.5  | 3.2  | 2.6  |
| 231798_at    | NOG       | 0.9 | 0.9 | 0.8 | 0.9 | 0.4 | 0.6  | 0.5  | 0.4  | 0.4  |
| 244855_at    | NQO2      | 1.1 | 1.0 | 0.8 | 0.9 | 1.2 | 13.0 | 5.3  | 7.5  | 19.7 |
| 202340_x_at  | NR4A1     | 1.0 | 1.1 | 1.1 | 1.7 | 3.2 | 3.0  | 6.5  | 3.5  | 3.2  |
| 204621_s_at  | NR4A2     | 0.8 | 0.7 | 0.9 | 1.6 | 2.6 | 3.0  | 9.2  | 3.0  | 3.0  |
| 235739_at    | NR4A2     | 0.9 | 1.2 | 1.1 | 1.2 | 2.1 | 2.6  | 8.6  | 3.2  | 2.6  |
| 207978_s_at  | NR4A3     | 0.8 | 0.7 | 0.9 | 1.3 | 2.1 | 2.1  | 4.0  | 2.8  | 2.5  |
| 209959_at    | NR4A3     | 0.1 | 0.9 | 0.9 | 2.0 | 2.5 | 3.2  | 5.3  | 3.0  | 4.3  |
| 204435_at    | NUPL1     | 0.7 | 1.2 | 1.3 | 1.5 | 2.3 | 1.5  | 3.2  | 3.0  | 2.0  |
| 219334_s_at  | OBFC2A    | 0.4 | 0.9 | 1.1 | 1.1 | 1.6 | 2.6  | 3.7  | 3.5  | 4.9  |
| 222872_x_at  | OBFC2A    | 0.9 | 0.9 | 1.0 | 1.3 | 2.8 | 4.0  | 5.7  | 4.9  | 6.5  |
| 233085_s_at  | OBFC2A    | 0.7 | 1.1 | 1.0 | 1.7 | 2.8 | 2.8  | 7.0  | 4.9  | 5.7  |
| 205729_at    | OSMR      | 1.1 | 0.9 | 1.1 | 1.5 | 1.7 | 1.7  | 2.1  | 2.3  | 2.3  |
| 226140_s_at  | OTUD1     | 1.3 | 1.1 | 1.0 | 1.9 | 2.1 | 1.9  | 4.6  | 2.3  | 2.5  |
| 243296_at    | PBEF1     | 0.9 | 1.1 | 0.8 | 0.9 | 2.5 | 2.1  | 4.0  | 3.7  | 4.0  |
| 205534_at    | PCDH7     | 1.1 | 1.3 | 0.9 | 1.0 | 3.2 | 2.5  | 5.3  | 5.7  | 4.3  |
| 205535_s_at  | PCDH7     | 0.7 | 1.3 | 1.1 | 1.2 | 1.9 | 1.6  | 6.1  | 3.5  | 2.8  |
| 232382_s_at  | PCMTD1    | 1.1 | 1.1 | 1.0 | 1.0 | 0.8 | 0.9  | 0.5  | 0.4  | 0.4  |
| 238902_at    | PCMTD1    | 0.9 | 1.1 | 1.1 | 0.8 | 0.5 | 0.4  | 0.4  | 0.3  | 0.3  |
| 230109_at    | PDE7B     | 0.8 | 0.8 | 0.9 | 0.8 | 0.5 | 0.6  | 0.4  | 0.4  | 0.5  |
| 202464_s_at  | PFKFB3    | 0.9 | 1.1 | 1.1 | 1.2 | 1.1 | 1.5  | 4.0  | 2.3  | 2.3  |
| 217996_at    | PHLDA1    | 0.7 | 1.0 | 1.3 | 1.3 | 4.0 | 3.7  | 4.0  | 5.3  | 4.6  |
| 217997_at    | PHLDA1    | 0.6 | 0.9 | 1.5 | 1.2 | 2.8 | 3.5  | 3.5  | 3.7  | 4.6  |
| 218000_s_at  | PHLDA1    | 0.4 | 1.1 | 1.3 | 1.3 | 5.7 | 5.7  | 4.6  | 7.0  | 6.1  |
| 225842_at    | PHLDA1    | 0.8 | 1.0 | 1.3 | 1.1 | 2.0 | 2.5  | 2.6  | 2.6  | 2.3  |
| 239102_s_at  | PICALM    | 0.8 | 1.3 | 1.5 | 1.3 | 2.3 | 1.4  | 4.3  | 2.8  | 2.1  |
| 210845_s_at  | PLAUR     | 1.0 | 0.9 | 1.1 | 1.2 | 2.5 | 2.5  | 4.0  | 4.0  | 4.0  |
| 211924_s_at  | PLAUR     | 1.3 | 0.9 | 1.3 | 1.2 | 2.0 | 2.8  | 3.2  | 4.3  | 4.6  |

|              |          |     |      |      |      |       |       |       |        |       |
|--------------|----------|-----|------|------|------|-------|-------|-------|--------|-------|
| 1558836_at   | PLGLB1   | 1.0 | 1.3  | 1.1  | 0.9  | 1.9   | 1.3   | 3.7   | 2.3    | 2.8   |
| 204285_s_at  | PMAIP1   | 0.9 | 0.9  | 1.0  | 1.3  | 2.0   | 2.3   | 4.0   | 3.2    | 3.7   |
| 204286_s_at  | PMAIP1   | 0.8 | 0.8  | 0.9  | 1.2  | 2.3   | 2.3   | 3.7   | 3.2    | 4.0   |
| 1554609_at   | POLD3    | 0.9 | 0.8  | 0.6  | 0.6  | 0.3   | 0.3   | 0.4   | 0.5    | 0.3   |
| 212226_s_at  | PPAP2B   | 0.9 | 1.0  | 0.8  | 0.9  | 1.9   | 1.6   | 2.8   | 2.3    | 2.5   |
| 212230_at    | PPAP2B   | 1.0 | 0.9  | 0.9  | 1.0  | 1.5   | 1.7   | 2.3   | 2.3    | 2.6   |
| 218273_s_at  | PPM2C    | 1.1 | 1.0  | 0.9  | 1.1  | 2.0   | 1.9   | 3.5   | 2.6    | 2.5   |
| 222572_at    | PPM2C    | 1.0 | 1.0  | 1.1  | 1.1  | 2.0   | 2.0   | 3.2   | 3.0    | 2.5   |
| 202014_at    | PPP1R15A | 0.8 | 1.1  | 1.3  | 1.7  | 3.5   | 3.5   | 8.0   | 4.3    | 4.9   |
| 37028_at     | PPP1R15A | 1.1 | 1.2  | 1.0  | 1.3  | 2.8   | 2.6   | 8.6   | 4.6    | 3.2   |
| 224692_at    | PPP1R15B | 0.9 | 1.1  | 1.1  | 1.6  | 2.0   | 2.1   | 2.6   | 2.3    | 2.3   |
| 1552670_a_at | PPP1R3B  | 1.3 | 1.3  | 0.9  | 1.1  | 1.1   | 1.1   | 4.0   | 3.0    | 3.7   |
| 225066_at    | PPP2R2D  | 0.9 | 1.6  | 2.8  | 1.4  | 2.0   | 1.4   | 7.5   | 3.7    | 2.1   |
| 201594_s_at  | PPP4R1   | 1.0 | 0.9  | 1.1  | 1.1  | 1.4   | 1.6   | 2.0   | 2.0    | 2.0   |
| 227510_x_at  | PRO1073  | 0.8 | 1.7  | 1.1  | 1.1  | 1.9   | 1.6   | 6.1   | 2.8    | 2.8   |
| 209586_s_at  | PRUNE    | 1.1 | 1.1  | 1.0  | 0.9  | 0.6   | 0.6   | 0.5   | 0.5    | 0.5   |
| 210988_s_at  | PRUNE    | 1.1 | 0.9  | 1.0  | 0.9  | 0.7   | 0.5   | 0.4   | 0.5    | 0.4   |
| 204748_at    | PTGS2    | 1.3 | 1.3  | 1.6  | 5.3  | 6.1   | 9.2   | 8.6   | 7.5    | 8.6   |
| 1554997_a_at | PTGS2    | 1.3 | 1.3  | 1.4  | 5.3  | 7.5   | 11.3  | 9.2   | 8.6    | 11.3  |
| 208965_s_at  | PYHIN1   | 1.1 | 1.1  | 1.0  | 1.1  | 2.0   | 2.0   | 2.5   | 2.8    | 2.8   |
| 1557432_at   | RASAL2   | 0.8 | 1.1  | 0.9  | 0.9  | 1.1   | 1.5   | 2.8   | 2.3    | 2.8   |
| 223467_at    | RASD1    | 1.9 | 0.6  | 0.9  | 1.9  | 2.1   | 4.9   | 4.6   | 3.5    | 6.1   |
| 1568768_s_at | RBKS     | 0.5 | 1.1  | 1.5  | 3.0  | 5.7   | 6.5   | 6.5   | 6.5    | 6.1   |
| 228455_at    | RBM15    | 0.7 | 1.0  | 1.1  | 0.8  | 0.6   | 0.5   | 0.5   | 0.5    | 0.4   |
| 202388_at    | RGS2     | 0.8 | 0.9  | 0.9  | 0.8  | 1.6   | 2.1   | 4.9   | 3.5    | 4.3   |
| 212099_at    | RHOB     | 0.9 | 0.9  | 1.1  | 1.6  | 2.1   | 2.6   | 2.8   | 2.5    | 2.8   |
| 1553962_s_at | RHOB     | 0.9 | 0.8  | 1.1  | 1.9  | 2.1   | 2.3   | 2.8   | 2.3    | 2.3   |
| 223168_at    | RHOU     | 1.0 | 1.0  | 0.8  | 0.8  | 0.6   | 0.6   | 0.5   | 0.5    | 0.4   |
| 229285_at    | RNASEL   | 1.1 | 1.1  | 0.9  | 0.6  | 0.6   | 0.4   | 0.2   | 0.3    | 0.5   |
| 212724_at    | RND3     | 0.9 | 0.9  | 0.9  | 1.1  | 1.4   | 1.5   | 3.7   | 2.6    | 2.6   |
| 236114_at    | RUNX1    | 1.0 | 1.2  | 0.9  | 1.0  | 2.1   | 2.5   | 2.6   | 2.8    | 2.3   |
| 238909_at    | S100A10  | 0.8 | 0.9  | 0.9  | 1.1  | 2.1   | 1.9   | 3.0   | 2.6    | 2.8   |
| 204268_at    | S100A2   | 1.1 | 0.9  | 1.1  | 1.1  | 1.6   | 2.3   | 3.0   | 3.0    | 3.7   |
| 228923_at    | S100A6   | 1.2 | 1.1  | 1.6  | 2.0  | 2.8   | 2.8   | 4.9   | 2.8    | 2.6   |
| 203455_s_at  | SAT1     | 1.1 | 1.4  | 1.4  | 1.9  | 3.2   | 3.0   | 3.2   | 3.5    | 3.2   |
| 210592_s_at  | SAT1     | 1.2 | 1.4  | 1.4  | 1.9  | 3.5   | 3.2   | 3.7   | 4.0    | 4.0   |
| 213988_s_at  | SAT1     | 1.2 | 1.5  | 1.5  | 2.3  | 4.9   | 3.7   | 6.1   | 4.9    | 4.6   |
| 230333_at    | SAT1     | 1.9 | 2.1  | 2.5  | 4.0  | 7.0   | 6.5   | 9.2   | 7.0    | 8.6   |
| 235147_at    | SATB2    | 0.7 | 1.2  | 0.2  | 0.6  | 0.6   | 0.6   | 0.5   | 0.3    | 0.5   |
| 202071_at    | SDC4     | 0.9 | 1.1  | 1.1  | 1.5  | 1.9   | 1.9   | 3.0   | 2.3    | 2.1   |
| 234725_s_at  | SEMA4B   | 1.1 | 1.0  | 0.9  | 0.9  | 1.6   | 1.7   | 3.2   | 2.6    | 2.3   |
| 228398_at    | SENP8    | 1.3 | 0.9  | 0.8  | 0.8  | 0.5   | 0.3   | 0.4   | 0.4    | 0.5   |
| 1552684_a_at | SENP8    | 1.0 | 1.1  | 0.8  | 0.8  | 0.5   | 0.5   | 0.2   | 0.5    | 0.5   |
| 1558937_s_at | SERF1A   | 0.4 | 1.1  | 0.9  | 0.7  | 0.6   | 0.5   | 0.3   | 0.4    | 0.4   |
| 239213_at    | SERPINB1 | 1.2 | 1.3  | 2.8  | 0.9  | 1.9   | 1.4   | 9.2   | 9.2    | 9.8   |
| 209719_x_at  | SERPINB3 | 1.5 | 2.5  | 6.1  | 6.1  | 34.3  | 22.6  | 68.6  | 68.6   | 42.2  |
| 209720_s_at  | SERPINB3 | 0.9 | 26.0 | 27.9 | 64.0 | 274.4 | 294.1 | 630.3 | 1260.7 | 548.7 |
| 210413_x_at  | SERPINB4 | 2.5 | 2.8  | 3.2  | 1.6  | 24.3  | 13.0  | 21.1  | 52.0   | 26.0  |
| 211906_s_at  | SERPINB4 | 0.5 | 3.7  | 0.1  | 0.3  | 294.1 | 17.1  | 11.3  | 776.0  | 36.8  |
| 223394_at    | SERTAD1  | 1.2 | 1.1  | 1.5  | 1.4  | 2.6   | 3.0   | 5.3   | 3.7    | 3.7   |
| 202656_s_at  | SERTAD2  | 1.0 | 0.9  | 1.0  | 1.1  | 1.9   | 1.9   | 2.6   | 2.5    | 2.3   |
| 202657_s_at  | SERTAD2  | 1.0 | 1.1  | 1.1  | 1.2  | 2.0   | 2.0   | 2.6   | 2.3    | 2.1   |
| 223196_s_at  | SESN2    | 2.8 | 1.2  | 1.1  | 1.1  | 0.2   | 1.9   | 2.8   | 2.0    | 5.3   |
| 209260_at    | SFN      | 1.0 | 1.0  | 1.1  | 1.2  | 2.0   | 1.6   | 2.1   | 2.6    | 2.3   |
| 33323_r_at   | SFN      | 1.0 | 1.1  | 1.0  | 1.1  | 1.7   | 1.6   | 2.1   | 2.3    | 2.0   |
| 201739_at    | SGK      | 0.8 | 0.8  | 1.0  | 1.3  | 1.9   | 2.5   | 2.5   | 2.1    | 2.6   |
| 242963_at    | SGMS2    | 0.9 | 0.9  | 1.1  | 1.6  | 2.8   | 2.5   | 3.5   | 2.5    | 2.6   |
| 1569263_at   | SLC16A3  | 1.5 | 1.1  | 0.7  | 1.2  | 1.7   | 2.1   | 6.5   | 2.0    | 3.2   |
| 230494_at    | SLC20A1  | 0.7 | 1.1  | 1.1  | 1.1  | 2.0   | 2.0   | 4.6   | 2.0    | 2.1   |
| 239474_at    | SLC6A6   | 1.1 | 1.7  | 1.3  | 1.2  | 3.0   | 1.5   | 4.0   | 4.9    | 2.5   |
| 223666_at    | SNX5     | 1.1 | 1.1  | 1.1  | 1.6  | 2.3   | 2.0   | 5.3   | 2.1    | 2.1   |
| 203372_s_at  | SOCS2    | 1.0 | 0.8  | 1.0  | 0.6  | 1.6   | 1.2   | 3.7   | 2.8    | 2.5   |
| 203373_at    | SOCS2    | 0.9 | 0.7  | 0.9  | 0.8  | 1.2   | 1.6   | 4.0   | 2.6    | 3.2   |
| 206359_at    | SOCS3    | 1.1 | 0.8  | 1.0  | 1.7  | 2.6   | 2.1   | 6.1   | 4.3    | 4.6   |
| 206360_s_at  | SOCS3    | 1.2 | 0.8  | 1.1  | 1.3  | 1.7   | 1.5   | 3.0   | 2.1    | 2.1   |
| 227697_at    | SOCS3    | 0.9 | 0.8  | 0.9  | 1.7  | 3.2   | 3.5   | 7.0   | 4.9    | 5.7   |
| 215078_at    | SOD2     | 1.9 | 1.0  | 3.5  | 6.5  | 7.0   | 8.0   | 104.0 | 9.2    | 9.8   |

|              |           |     |     |     |     |     |      |      |      |      |
|--------------|-----------|-----|-----|-----|-----|-----|------|------|------|------|
| 215223_s_at  | SOD2      | 1.3 | 1.6 | 1.5 | 2.0 | 2.8 | 2.8  | 4.6  | 3.5  | 3.5  |
| 216841_s_at  | SOD2      | 1.2 | 1.4 | 1.3 | 1.9 | 2.5 | 2.1  | 3.0  | 2.5  | 2.5  |
| 202935_s_at  | SOX9      | 0.9 | 0.9 | 0.9 | 0.9 | 2.0 | 2.3  | 4.0  | 2.3  | 2.8  |
| 235680_at    | STAT3     | 0.6 | 0.8 | 1.1 | 1.4 | 2.1 | 1.6  | 2.8  | 2.6  | 2.1  |
| 243213_at    | STAT3     | 0.8 | 1.9 | 1.3 | 1.3 | 3.2 | 1.9  | 4.9  | 7.0  | 2.5  |
| 203439_s_at  | STC2      | 0.7 | 0.8 | 0.9 | 0.8 | 1.4 | 1.1  | 2.6  | 2.3  | 2.1  |
| 209238_at    | STX3      | 0.9 | 1.1 | 0.9 | 1.6 | 2.3 | 2.1  | 3.0  | 3.0  | 2.0  |
| 204067_at    | SUOX      | 1.1 | 0.9 | 1.0 | 0.8 | 0.6 | 0.8  | 0.5  | 0.5  | 0.4  |
| 230052_s_at  | TA-NFKBH  | 1.0 | 1.2 | 1.3 | 1.5 | 2.3 | 2.0  | 3.2  | 2.8  | 2.3  |
| 240206_at    | TARS      | 0.5 | 0.9 | 0.9 | 1.1 | 1.4 | 2.1  | 3.0  | 2.5  | 2.5  |
| 226625_at    | TGFBR3    | 1.1 | 1.0 | 0.9 | 0.8 | 0.7 | 0.6  | 0.5  | 0.5  | 0.5  |
| 230380_at    | THAP2     | 0.9 | 1.1 | 1.3 | 2.1 | 2.5 | 2.8  | 4.6  | 2.8  | 2.6  |
| 203887_s_at  | THBD      | 1.0 | 1.2 | 1.5 | 1.3 | 1.2 | 1.5  | 2.3  | 2.0  | 2.3  |
| 201107_s_at  | THBS1     | 2.0 | 0.7 | 1.3 | 1.1 | 1.4 | 2.0  | 3.0  | 4.6  | 4.3  |
| 201109_s_at  | THBS1     | 1.0 | 1.1 | 1.2 | 1.1 | 2.3 | 2.0  | 2.6  | 2.8  | 3.0  |
| 201110_s_at  | THBS1     | 0.9 | 1.0 | 1.1 | 1.1 | 2.0 | 2.0  | 2.3  | 2.1  | 2.6  |
| 213352_at    | TMCC1     | 0.8 | 1.0 | 1.0 | 0.7 | 0.4 | 0.5  | 0.4  | 0.5  | 0.4  |
| 227112_at    | TMCC1     | 0.9 | 0.8 | 0.8 | 0.7 | 0.5 | 0.5  | 0.3  | 0.4  | 0.5  |
| 213338_at    | TMEM158   | 1.1 | 1.1 | 1.0 | 0.9 | 1.5 | 1.4  | 2.5  | 2.6  | 2.1  |
| 218113_at    | TMEM2     | 1.0 | 1.1 | 1.1 | 1.7 | 2.5 | 2.1  | 2.6  | 2.6  | 2.5  |
| 224917_at    | TMEM49    | 0.8 | 1.1 | 1.5 | 1.7 | 3.5 | 3.0  | 2.6  | 3.2  | 3.0  |
| 231697_s_at  | TMEM49    | 0.8 | 1.0 | 1.2 | 2.0 | 3.5 | 3.2  | 2.6  | 3.5  | 4.0  |
| 1569003_at   | TMEM49    | 0.9 | 1.1 | 1.2 | 1.6 | 3.0 | 2.3  | 2.0  | 2.6  | 2.5  |
| 222449_at    | TMEPAI    | 1.0 | 0.9 | 1.2 | 1.3 | 2.5 | 2.6  | 3.2  | 3.0  | 2.8  |
| 202643_s_at  | TNFAIP3   | 1.1 | 1.0 | 1.0 | 0.8 | 1.5 | 2.6  | 5.7  | 2.8  | 4.3  |
| 202644_s_at  | TNFAIP3   | 1.1 | 0.9 | 1.1 | 0.9 | 1.2 | 2.5  | 5.7  | 2.3  | 3.7  |
| 227345_at    | TNFRSF10D | 1.1 | 1.0 | 1.0 | 1.0 | 1.3 | 1.7  | 3.5  | 2.3  | 3.2  |
| 218368_s_at  | TNFRSF12A | 0.8 | 0.9 | 1.2 | 1.4 | 2.5 | 2.5  | 2.0  | 2.3  | 2.1  |
| 202241_at    | TRIB1     | 0.9 | 0.9 | 1.1 | 1.4 | 3.2 | 3.7  | 5.7  | 4.9  | 4.6  |
| 1554250_s_at | TRIM73    | 0.9 | 1.0 | 1.0 | 1.2 | 1.4 | 1.0  | 8.6  | 2.1  | 2.3  |
| 233771_at    | TRIO      | 2.5 | 1.3 | 1.5 | 1.4 | 2.3 | 2.6  | 4.0  | 2.8  | 7.0  |
| 204094_s_at  | TSC22D2   | 0.9 | 1.0 | 1.1 | 1.2 | 1.9 | 2.0  | 3.2  | 2.0  | 2.1  |
| 223282_at    | TSHZ1     | 1.1 | 1.1 | 1.0 | 1.1 | 0.6 | 0.5  | 0.4  | 0.3  | 0.4  |
| 1554588_a_at | TTC30B    | 0.9 | 1.0 | 0.9 | 0.6 | 0.5 | 0.4  | 0.3  | 0.5  | 0.3  |
| 204141_at    | TUBB2A    | 0.9 | 0.9 | 1.0 | 1.1 | 1.5 | 1.5  | 3.5  | 2.5  | 2.1  |
| 201008_s_at  | TXNIP     | 1.1 | 1.1 | 1.0 | 0.8 | 0.5 | 0.4  | 0.3  | 0.3  | 0.3  |
| 201009_s_at  | TXNIP     | 1.1 | 1.1 | 1.0 | 0.8 | 0.5 | 0.4  | 0.4  | 0.3  | 0.3  |
| 201010_s_at  | TXNIP     | 0.9 | 1.1 | 1.1 | 0.8 | 0.5 | 0.4  | 0.4  | 0.4  | 0.3  |
| 204881_s_at  | UGCG      | 1.1 | 1.2 | 1.1 | 1.6 | 2.8 | 2.5  | 3.2  | 2.3  | 2.3  |
| 221765_at    | UGCG      | 1.3 | 0.7 | 0.8 | 1.3 | 2.3 | 2.3  | 3.0  | 2.5  | 2.0  |
| 224967_at    | UGCG      | 1.1 | 0.9 | 0.9 | 1.5 | 2.3 | 2.0  | 2.6  | 2.3  | 2.3  |
| 238542_at    | ULBP2     | 0.5 | 0.6 | 0.8 | 0.8 | 1.1 | 1.5  | 2.3  | 2.3  | 2.3  |
| 220370_s_at  | USP36     | 0.9 | 0.9 | 1.2 | 1.6 | 2.3 | 1.9  | 3.7  | 2.6  | 2.3  |
| 221704_s_at  | VPS37B    | 1.5 | 1.2 | 1.6 | 1.9 | 1.9 | 1.7  | 3.0  | 2.3  | 2.6  |
| 213425_at    | WNT5A     | 0.9 | 1.0 | 1.0 | 0.9 | 0.8 | 0.8  | 0.4  | 0.5  | 0.4  |
| 227501_at    | WSB1      | 1.1 | 1.0 | 1.0 | 0.8 | 1.4 | 1.4  | 4.0  | 2.3  | 2.3  |
| 215150_at    | YOD1      | 1.1 | 0.9 | 0.9 | 1.4 | 2.0 | 2.1  | 3.5  | 2.8  | 3.5  |
| 227309_at    | YOD1      | 1.0 | 0.9 | 1.0 | 1.3 | 2.0 | 2.3  | 3.7  | 2.5  | 2.6  |
| 227978_s_at  | ZADH2     | 0.9 | 1.0 | 1.1 | 0.9 | 0.5 | 0.6  | 0.4  | 0.5  | 0.5  |
| 218810_at    | ZC3H12A   | 6.5 | 1.1 | 3.5 | 5.3 | 3.0 | 21.1 | 13.0 | 4.9  | 24.3 |
| 231899_at    | ZC3H12C   | 0.9 | 1.1 | 1.1 | 1.6 | 2.1 | 2.6  | 2.1  | 2.3  | 2.1  |
| 1552283_s_at | ZDHHC11   | 1.1 | 1.1 | 0.9 | 1.1 | 1.6 | 2.1  | 2.3  | 2.5  | 2.1  |
| 201531_at    | ZFP36     | 1.6 | 1.2 | 1.7 | 6.5 | 8.0 | 9.8  | 39.4 | 14.9 | 19.7 |
| 214670_at    | ZKSCAN1   | 1.1 | 0.9 | 0.9 | 0.8 | 0.5 | 0.5  | 0.4  | 0.4  | 0.4  |
| 1557953_at   | ZKSCAN1   | 1.1 | 1.0 | 1.1 | 0.7 | 0.4 | 0.5  | 0.5  | 0.4  | 0.5  |
| 222619_at    | ZNF281    | 0.9 | 1.0 | 1.0 | 1.1 | 1.7 | 1.9  | 3.5  | 2.3  | 2.5  |
| 211064_at    | ZNF493    | 1.0 | 1.1 | 1.2 | 0.8 | 0.8 | 0.4  | 0.5  | 0.4  | 0.5  |
| 227195_at    | ZNF503    | 0.9 | 1.0 | 1.2 | 1.1 | 1.7 | 1.5  | 3.0  | 2.5  | 2.0  |
| 235304_at    | ZNF573    | 0.7 | 0.9 | 1.0 | 0.7 | 0.4 | 0.5  | 0.4  | 0.3  | 0.5  |
| 228005_at    | ZXDB      | 1.0 | 0.8 | 0.9 | 1.0 | 0.7 | 0.7  | 0.5  | 0.4  | 0.5  |

\* : Values are fold change relative to uninfected cells
