# Supplementary material for: Salmonella Typhimurium Type III Secretion Effectors Stimulate Innate Immune Responses in Cultured Epithelial Cells
Source: PubMed Central journal article supplement (PMC2714975; doi:10.1371/journal.ppat.1000538), 2009-08-07
Supplement: ppat.1000538.s007.pdf [file ppat.1000538.s007.pdf]

Table S2. *P* values (two-tailed *t* test) of the fold changes listed in Table S1

| Probeset     | Gene     | $\Delta\text{invA}$ | $\Delta\text{invA}$ | effectorless | $\Delta\text{sopB/E/E2}$ | $\Delta\text{sopB}$ | $\Delta\text{sopB}$ | $\Delta\text{sopB}$ | wild type | wild type | wild type |
|--------------|----------|---------------------|---------------------|--------------|--------------------------|---------------------|---------------------|---------------------|-----------|-----------|-----------|
| 206411_s_at  | ABL2     | 5.0E-01             | 5.0E-01             | 5.0E-01      | 8.5E-03                  | 8.7E-04             | 1.7E-04             | 2.0E-05             | 2.0E-05   | 2.0E-05   | 2.0E-05   |
| 231907_at    | ABL2     | 6.0E-01             | 5.0E-01             | 3.5E-01      | 2.0E-05                  | 2.0E-05             | 1.2E-03             | 2.0E-05             | 2.0E-05   | 2.0E-05   | 2.0E-05   |
| 202912_at    | ADM      | 9.8E-01             | 5.0E-01             | 3.0E-05      | 2.3E-05                  | 3.0E-05             | 2.0E-05             | 2.0E-05             | 2.0E-05   | 2.3E-05   | 2.0E-05   |
| 206170_at    | ADRB2    | 5.0E-01             | 5.0E-01             | 1.2E-01      | 5.0E-01                  | 4.4E-04             | 2.8E-03             | 8.8E-05             | 8.7E-04   | 6.2E-04   | 6.2E-04   |
| 212543_at    | AIM1     | 4.4E-02             | 1.8E-02             | 5.0E-01      | 5.1E-02                  | 2.0E-05             | 3.0E-05             | 1.2E-03             | 2.0E-05   | 2.0E-05   | 4.6E-05   |
| 210517_s_at  | AKAP12   | 9.9E-01             | 5.0E-01             | 2.7E-05      | 8.8E-05                  | 5.2E-05             | 2.0E-05             | 2.0E-05             | 2.0E-05   | 2.0E-05   | 2.0E-05   |
| 227529_s_at  | AKAP12   | 9.6E-01             | 7.6E-01             | 1.5E-01      | 5.0E-01                  | 2.7E-02             | 3.0E-05             | 4.6E-05             | 2.0E-05   | 2.0E-05   | 2.7E-05   |
| 227530_at    | AKAP12   | 5.0E-01             | 9.3E-01             | 3.8E-02      | 5.0E-01                  | 2.0E-05             | 2.3E-05             | 2.0E-05             | 2.0E-05   | 2.0E-05   | 2.0E-05   |
| 227337_at    | ANKRD37  | 9.0E-01             | 5.0E-01             | 5.0E-01      | 8.9E-02                  | 2.1E-04             | 4.4E-04             | 1.5E-04             | 5.2E-05   | 3.9E-04   | 3.9E-04   |
| 219496_at    | ANKRD57  | 9.8E-01             | 9.3E-01             | 3.5E-04      | 3.5E-05                  | 2.7E-05             | 2.0E-05             | 2.0E-05             | 2.0E-05   | 2.0E-05   | 2.0E-05   |
| 227034_at    | ANKRD57  | 9.2E-01             | 5.0E-01             | 2.7E-01      | 2.0E-05                  | 2.0E-05             | 2.0E-05             | 2.0E-05             | 2.0E-05   | 2.0E-05   | 2.0E-05   |
| 205239_at    | AREG     | 1.0E+00             | 7.5E-01             | 1.9E-04      | 2.0E-05                  | 2.0E-05             | 2.0E-05             | 2.0E-05             | 2.0E-05   | 2.0E-05   | 2.0E-05   |
| 220382_s_at  | ARHGAP28 | 5.0E-01             | 3.0E-01             | 9.8E-01      | 5.8E-01                  | 9.0E-01             | 8.2E-01             | 1.0E+00             | 1.0E+00   | 1.0E+00   | 1.0E+00   |
| 242727_at    | ARL5B    | 1.4E-01             | 5.0E-01             | 5.0E-01      | 7.8E-03                  | 2.0E-05             | 8.8E-05             | 1.9E-04             | 3.0E-05   | 7.7E-04   | 7.7E-04   |
| 224797_at    | ARRDC3   | 8.6E-01             | 9.9E-01             | 5.0E-01      | 1.9E-04                  | 2.0E-05             | 2.0E-05             | 2.0E-05             | 2.0E-05   | 2.0E-05   | 2.0E-05   |
| 202672_s_at  | ATF3     | 8.4E-01             | 9.4E-01             | 5.0E-01      | 2.0E-05                  | 2.0E-05             | 2.0E-05             | 2.0E-05             | 2.0E-05   | 2.0E-05   | 2.0E-05   |
| 1554980_a_at | ATF3     | 3.0E-01             | 5.0E-01             | 9.3E-01      | 4.4E-04                  | 7.7E-04             | 1.5E-04             | 2.0E-05             | 2.7E-05   | 1.0E-04   | 1.0E-04   |
| 225557_at    | AXUD1    | 5.0E-01             | 7.6E-01             | 5.0E-01      | 7.8E-05                  | 2.0E-05             | 5.2E-05             | 2.0E-05             | 6.8E-05   | 2.7E-05   | 2.7E-05   |
| 225612_s_at  | B3GNT5   | 5.0E-01             | 5.0E-01             | 1.5E-01      | 2.0E-05                  | 2.0E-05             | 2.0E-05             | 2.0E-05             | 2.0E-05   | 2.0E-05   | 2.0E-05   |
| 1554835_a_at | B3GNT5   | 2.1E-01             | 2.3E-01             | 5.0E-01      | 2.7E-02                  | 2.1E-04             | 4.9E-04             | 1.9E-04             | 7.7E-04   | 2.7E-04   | 2.7E-04   |
| 221485_at    | B4GALT5  | 5.0E-01             | 5.0E-01             | 5.0E-01      | 2.0E-03                  | 2.0E-05             | 2.0E-05             | 2.0E-05             | 2.0E-05   | 2.0E-05   | 2.0E-05   |
| 204032_at    | BCAR3    | 5.0E-01             | 5.0E-01             | 2.4E-01      | 3.9E-04                  | 7.8E-05             | 2.0E-05             | 2.0E-05             | 2.0E-05   | 2.0E-05   | 2.0E-05   |
| 1557257_at   | BCL10    | 5.0E-01             | 1.5E-01             | 1.2E-02      | 1.5E-03                  | 1.7E-04             | 1.3E-04             | 4.6E-05             | 1.3E-04   | 3.1E-04   | 3.1E-04   |
| 204908_s_at  | BCL3     | 1.5E-01             | 5.1E-02             | 5.0E-01      | 4.9E-04                  | 2.7E-05             | 8.8E-05             | 2.0E-05             | 7.8E-05   | 1.7E-04   | 1.7E-04   |
| 201169_s_at  | BHLHB2   | 5.0E-01             | 7.5E-01             | 5.0E-01      | 2.5E-01                  | 2.0E-05             | 2.0E-05             | 2.0E-05             | 2.0E-05   | 2.0E-05   | 2.0E-05   |
| 201170_s_at  | BHLHB2   | 1.0E+00             | 1.0E+00             | 8.4E-01      | 1.9E-04                  | 2.0E-05             | 2.0E-05             | 2.0E-05             | 2.0E-05   | 2.0E-05   | 2.0E-05   |
| 210538_s_at  | BIRC3    | 3.1E-01             | 1.2E-03             | 3.1E-04      | 2.0E-02                  | 7.8E-05             | 5.2E-05             | 2.7E-05             | 2.0E-05   | 3.5E-05   | 3.5E-05   |
| 220178_at    | C19ORF28 | 7.3E-01             | 5.0E-01             | 3.0E-05      | 2.0E-05                  | 2.0E-05             | 2.3E-05             | 2.0E-05             | 2.0E-05   | 2.0E-05   | 2.0E-05   |
| 1558834_s_at | C1ORF62  | 3.9E-01             | 3.2E-01             | 5.0E-01      | 6.7E-01                  | 1.7E-04             | 7.1E-03             | 2.3E-05             | 2.0E-05   | 4.6E-05   | 4.6E-05   |
| 219474_at    | C3ORF52  | 5.0E-01             | 6.2E-01             | 1.3E-01      | 4.9E-03                  | 6.9E-04             | 2.8E-03             | 2.3E-05             | 4.9E-04   | 4.9E-04   | 4.9E-04   |
| 1553868_a_at | C5ORF36  | 5.0E-01             | 9.9E-01             | 9.7E-01      | 1.0E+00                  | 1.0E+00             | 1.0E+00             | 1.0E+00             | 1.0E+00   | 1.0E+00   | 1.0E+00   |
| 218541_s_at  | C8ORF4   | 9.7E-01             | 1.2E-01             | 5.0E-01      | 1.6E-01                  | 6.5E-03             | 2.0E-02             | 1.8E-03             | 1.7E-04   | 3.9E-04   | 3.9E-04   |
| 213596_at    | CASP4    | 5.0E-01             | 5.0E-01             | 5.0E-01      | 3.8E-02                  | 2.7E-04             | 1.1E-04             | 4.0E-05             | 2.0E-05   | 2.0E-05   | 2.0E-05   |
| 216598_s_at  | CCL2     | 5.0E-01             | 5.0E-01             | 5.0E-01      | 4.5E-03                  | 2.0E-05             | 2.0E-05             | 2.0E-05             | 2.0E-05   | 2.0E-05   | 2.0E-05   |
| 205476_at    | CCL20    | 5.0E-01             | 1.5E-02             | 6.5E-01      | 5.8E-01                  | 2.3E-03             | 1.2E-02             | 2.1E-04             | 5.5E-04   | 4.0E-05   | 4.0E-05   |
| 202769_at    | CCNG2    | 7.9E-02             | 8.1E-01             | 1.0E+00      | 5.0E-01                  | 1.0E+00             | 1.0E+00             | 1.0E+00             | 1.0E+00   | 1.0E+00   | 1.0E+00   |
| 220046_s_at  | CCNL1    | 9.4E-01             | 5.0E-01             | 5.0E-01      | 2.1E-02                  | 2.0E-05             | 2.0E-05             | 2.0E-05             | 2.0E-05   | 2.0E-05   | 2.0E-05   |
| 1555411_a_at | CCNL1    | 5.0E-01             | 5.0E-01             | 5.0E-01      | 1.7E-01                  | 2.0E-05             | 2.0E-05             | 2.0E-05             | 2.0E-05   | 2.0E-05   | 2.0E-05   |
| 1555827_at   | CCNL1    | 5.0E-01             | 5.0E-01             | 5.0E-01      | 2.3E-01                  | 1.8E-03             | 1.2E-01             | 3.5E-05             | 3.5E-04   | 5.5E-04   | 5.5E-04   |
| 204695_at    | CDC25A   | 5.0E-01             | 5.0E-01             | 1.0E-02      | 1.3E-04                  | 8.7E-04             | 1.7E-04             | 4.0E-05             | 7.8E-05   | 4.6E-05   | 4.6E-05   |
| 1555772_a_at | CDC25A   | 5.0E-01             | 5.0E-01             | 1.5E-01      | 6.0E-05                  | 2.0E-05             | 3.0E-05             | 2.0E-05             | 2.0E-05   | 2.0E-05   | 2.0E-05   |
| 204677_at    | CDH5     | 1.7E-01             | 5.0E-01             | 9.4E-02      | 1.8E-02                  | 2.7E-04             | 7.7E-04             | 2.3E-05             | 1.9E-04   | 2.3E-05   | 2.3E-05   |
| 202284_s_at  | CDKN1A   | 5.0E-01             | 1.0E+00             | 5.0E-01      | 4.0E-05                  | 2.0E-05             | 2.0E-05             | 2.0E-05             | 2.0E-05   | 2.0E-05   | 2.0E-05   |
| 203973_s_at  | CEBPD    | 5.0E-01             | 1.7E-01             | 5.0E-01      | 2.0E-05                  | 2.0E-05             | 2.0E-05             | 2.0E-05             | 2.0E-05   | 2.0E-05   | 2.0E-05   |
| 213006_at    | CEBPD    | 8.4E-01             | 9.7E-01             | 5.0E-01      | 2.4E-04                  | 4.0E-05             | 8.8E-05             | 6.8E-05             | 5.2E-05   | 5.2E-05   | 5.2E-05   |
| 204203_at    | CEBPG    | 5.3E-01             | 5.0E-01             | 2.9E-02      | 2.0E-05                  | 4.9E-04             | 2.0E-05             | 2.0E-05             | 2.0E-05   | 2.0E-05   | 2.0E-05   |
| 219270_at    | CHAC1    | 8.5E-01             | 5.0E-01             | 5.0E-01      | 9.6E-01                  | 2.7E-01             | 2.5E-02             | 6.8E-05             | 2.3E-05   | 2.3E-05   | 2.3E-05   |
| 228297_at    | CNN3     | 5.0E-01             | 8.1E-01             | 5.0E-01      | 5.0E-01                  | 8.8E-05             | 2.0E-05             | 2.0E-05             | 2.0E-05   | 2.0E-05   | 2.0E-05   |
| 207630_s_at  | CREM     | 5.0E-01             | 9.7E-01             | 3.2E-01      | 4.6E-05                  | 2.0E-05             | 3.5E-04             | 2.0E-05             | 2.0E-05   | 2.0E-05   | 2.0E-05   |
| 209967_s_at  | CREM     | 8.9E-01             | 1.0E+00             | 1.6E-01      | 8.8E-05                  | 1.9E-04             | 7.8E-05             | 4.0E-05             | 3.5E-05   | 1.7E-04   | 1.7E-04   |
| 214508_x_at  | CREM     | 5.0E-01             | 9.3E-01             | 7.0E-02      | 2.0E-03                  | 1.3E-02             | 4.5E-03             | 2.5E-03             | 2.3E-05   | 1.7E-03   | 1.7E-03   |
| 209101_at    | CTGF     | 1.0E+00             | 1.0E+00             | 3.5E-04      | 2.7E-05                  | 3.5E-05             | 2.0E-05             | 2.3E-05             | 6.8E-05   | 2.0E-05   | 2.0E-05   |
| 209774_x_at  | CXCL2    | 5.0E-01             | 5.0E-01             | 3.7E-03      | 2.3E-05                  | 2.0E-05             | 2.0E-05             | 2.0E-05             | 2.0E-05   | 2.0E-05   | 2.0E-05   |
| 1569203_at   | CXCL2    | 8.4E-02             | 2.0E-02             | 7.5E-01      | 5.0E-01                  | 3.5E-04             | 1.3E-02             | 4.9E-04             | 2.0E-05   | 6.9E-04   | 6.9E-04   |
| 207850_at    | CXCL3    | 5.0E-01             | 5.0E-01             | 5.0E-01      | 4.5E-03                  | 1.9E-04             | 6.8E-05             | 4.6E-05             | 2.3E-05   | 2.3E-05   | 2.3E-05   |
| 212977_at    | CXCR7    | 5.0E-01             | 6.8E-01             | 7.5E-01      | 9.9E-01                  | 1.0E+00             | 1.0E+00             | 1.0E+00             | 1.0E+00   | 1.0E+00   | 1.0E+00   |
| 201289_at    | CYR61    | 1.0E+00             | 1.0E+00             | 3.4E-03      | 2.7E-04                  | 2.0E-05             | 2.0E-05             | 2.0E-05             | 2.0E-05   | 2.0E-05   | 2.0E-05   |
| 210764_s_at  | CYR61    | 9.9E-01             | 1.0E+00             | 1.5E-02      | 6.8E-05                  | 2.0E-05             | 2.0E-05             | 2.0E-05             | 2.0E-05   | 2.0E-05   | 2.0E-05   |
| 231919_at    | DBT      | 5.0E-01             | 5.0E-01             | 9.9E-01      | 1.0E+00                  | 1.0E+00             | 9.1E-01             | 1.0E+00             | 1.0E+00   | 1.0E+00   | 1.0E+00   |
| 204602_at    | DKK1     | 1.0E+00             | 1.0E+00             | 2.0E-05      | 2.0E-05                  | 2.0E-05             | 2.0E-05             | 2.0E-05             | 2.0E-05   | 2.0E-05   | 2.0E-05   |
| 1557394_at   | DLGAP4   | 2.1E-01             | 2.1E-02             | 5.0E-01      | 5.0E-01                  | 2.8E-03             | 2.0E-02             | 4.0E-05             | 3.0E-05   | 6.9E-04   | 6.9E-04   |
| 231297_at    | DOT1L    | 3.1E-01             | 5.0E-01             | 4.0E-01      | 5.8E-02                  | 5.9E-03             | 2.0E-05             | 6.2E-04             | 1.3E-03   | 2.1E-04   | 2.1E-04   |
| 201041_s_at  | DUSP1    | 1.0E+00             | 1.0E+00             | 5.0E-01      | 2.0E-05                  | 2.0E-05             | 2.7E-05             | 2.0E-05             | 2.0E-05   | 2.0E-05   | 2.0E-05   |
| 201044_x_at  | DUSP1    | 9.0E-01             | 1.0E+00             | 5.0E-01      | 7.8E-05                  | 2.0E-05             | 2.3E-05             | 2.0E-05             | 2.0E-05   | 2.0E-05   | 2.0E-05   |

|              |          |         |         |         |         |         |         |         |         |         |
|--------------|----------|---------|---------|---------|---------|---------|---------|---------|---------|---------|
| 204794_at    | DUSP2    | 3.0E-01 | 6.2E-01 | 1.8E-02 | 3.0E-03 | 3.9E-04 | 5.5E-04 | 1.5E-04 | 4.9E-04 | 2.3E-05 |
| 204014_at    | DUSP4    | 9.9E-01 | 1.0E+00 | 4.4E-04 | 4.6E-05 | 6.8E-05 | 6.8E-05 | 2.7E-05 | 1.9E-04 | 1.1E-04 |
| 204015_s_at  | DUSP4    | 1.0E+00 | 8.6E-01 | 9.7E-04 | 3.1E-04 | 2.0E-05 | 2.0E-05 | 2.0E-05 | 2.0E-05 | 2.0E-05 |
| 209457_at    | DUSP5    | 5.0E-01 | 5.3E-01 | 3.2E-01 | 4.4E-04 | 2.0E-05 | 2.0E-05 | 2.0E-05 | 2.0E-05 | 2.0E-05 |
| 208891_at    | DUSP6    | 1.0E+00 | 9.9E-01 | 5.0E-01 | 5.0E-01 | 4.0E-05 | 5.2E-05 | 2.7E-05 | 2.0E-05 | 2.0E-05 |
| 208892_s_at  | DUSP6    | 7.6E-01 | 9.4E-01 | 5.1E-02 | 4.0E-01 | 2.0E-05 | 2.0E-05 | 2.0E-05 | 2.0E-05 | 2.0E-05 |
| 208893_s_at  | DUSP6    | 9.3E-01 | 7.7E-01 | 1.4E-01 | 5.0E-01 | 4.9E-04 | 1.5E-03 | 2.3E-05 | 2.0E-05 | 2.1E-04 |
| 206374_at    | DUSP8    | 1.5E-01 | 5.0E-01 | 5.0E-01 | 2.4E-01 | 1.8E-02 | 1.4E-02 | 1.1E-04 | 6.9E-04 | 6.2E-04 |
| 201693_s_at  | EGR1     | 5.0E-01 | 8.1E-01 | 1.1E-01 | 5.0E-01 | 2.0E-05 | 2.0E-05 | 2.0E-05 | 2.0E-05 | 2.0E-05 |
| 201694_s_at  | EGR1     | 5.0E-01 | 8.9E-02 | 8.4E-02 | 6.2E-04 | 2.0E-05 | 2.0E-05 | 2.0E-05 | 2.0E-05 | 2.0E-05 |
| 227404_s_at  | EGR1     | 5.0E-01 | 5.0E-01 | 1.8E-02 | 2.0E-05 | 2.0E-05 | 2.0E-05 | 2.0E-05 | 2.0E-05 | 2.0E-05 |
| 206115_at    | EGR3     | 8.4E-02 | 5.0E-01 | 8.4E-01 | 9.7E-01 | 3.5E-05 | 2.3E-03 | 2.7E-04 | 1.5E-04 | 2.1E-04 |
| 218696_at    | EIF2AK3  | 5.0E-01 | 5.0E-01 | 5.0E-01 | 2.7E-04 | 2.0E-05 | 2.0E-05 | 2.0E-05 | 2.0E-05 | 2.0E-05 |
| 201303_at    | EIF4A3   | 5.0E-01 | 4.8E-01 | 1.5E-02 | 1.7E-04 | 2.0E-05 | 2.0E-05 | 2.0E-05 | 2.0E-05 | 2.0E-05 |
| 235592_at    | ELL2     | 1.0E+00 | 6.2E-01 | 1.5E-03 | 5.4E-03 | 2.7E-05 | 1.7E-04 | 2.0E-05 | 2.0E-05 | 2.7E-05 |
| 201324_at    | EMP1     | 9.6E-01 | 5.0E-01 | 2.2E-01 | 1.8E-01 | 5.2E-05 | 2.0E-05 | 2.0E-05 | 3.5E-05 | 2.0E-05 |
| 201325_s_at  | EMP1     | 5.0E-01 | 9.7E-01 | 5.0E-01 | 2.4E-01 | 2.7E-04 | 1.5E-04 | 1.1E-04 | 2.0E-05 | 2.3E-05 |
| 242868_at    | EPAS1    | 5.0E-01 | 5.0E-01 | 5.0E-01 | 2.8E-03 | 4.0E-05 | 2.1E-04 | 2.3E-05 | 2.0E-05 | 3.1E-04 |
| 203499_at    | EPHA2    | 9.9E-01 | 9.2E-01 | 6.2E-02 | 4.0E-05 | 2.0E-05 | 2.0E-05 | 2.0E-05 | 2.0E-05 | 2.0E-05 |
| 205767_at    | EREG     | 7.6E-01 | 5.0E-01 | 8.8E-05 | 2.0E-05 | 2.3E-05 | 2.0E-05 | 2.0E-05 | 2.0E-05 | 2.0E-05 |
| 224657_at    | ERRF1    | 1.0E+00 | 1.0E+00 | 5.0E-01 | 5.2E-05 | 2.0E-05 | 2.0E-05 | 2.0E-05 | 2.0E-05 | 2.0E-05 |
| 224454_at    | ETNK1    | 5.2E-01 | 2.5E-03 | 1.4E-02 | 3.9E-04 | 2.3E-05 | 4.0E-05 | 6.8E-05 | 3.0E-05 | 1.1E-04 |
| 1555355_a_at | ETS1     | 7.8E-03 | 4.5E-03 | 2.8E-01 | 4.4E-02 | 3.0E-03 | 3.7E-03 | 1.5E-04 | 3.5E-04 | 1.9E-04 |
| 201328_at    | ETS2     | 5.0E-01 | 1.0E+00 | 1.0E+00 | 5.0E-01 | 1.7E-04 | 2.0E-05 | 2.3E-05 | 2.7E-05 | 2.0E-05 |
| 201329_s_at  | ETS2     | 8.6E-01 | 1.0E+00 | 1.0E+00 | 8.8E-05 | 2.0E-05 | 2.0E-05 | 2.0E-05 | 2.0E-05 | 2.0E-05 |
| 213506_at    | F2RL1    | 8.0E-01 | 9.3E-01 | 5.0E-01 | 5.0E-01 | 2.7E-05 | 2.0E-05 | 2.0E-05 | 2.0E-05 | 3.5E-05 |
| 204363_at    | F3       | 1.0E+00 | 5.0E-01 | 4.0E-05 | 2.7E-05 | 6.0E-05 | 6.8E-05 | 2.3E-05 | 4.0E-05 | 6.0E-05 |
| 227410_at    | FAM43A   | 7.9E-01 | 9.9E-01 | 5.0E-01 | 5.0E-01 | 1.0E+00 | 1.0E+00 | 1.0E+00 | 1.0E+00 | 1.0E+00 |
| 232202_at    | FAM83B   | 5.0E-01 | 9.5E-01 | 5.0E-01 | 4.3E-01 | 2.0E-05 | 1.5E-04 | 2.0E-05 | 2.0E-05 | 1.0E-04 |
| 223240_at    | FBXO8    | 5.0E-01 | 1.0E+00 | 9.4E-01 | 5.0E-01 | 1.0E+00 | 9.8E-01 | 1.0E+00 | 1.0E+00 | 1.0E+00 |
| 205650_s_at  | FGA      | 5.5E-01 | 5.0E-01 | 5.0E-01 | 5.0E-01 | 2.0E-05 | 2.4E-04 | 2.7E-04 | 2.0E-05 | 2.7E-04 |
| 204988_at    | FGB      | 2.7E-01 | 5.0E-01 | 3.0E-01 | 5.0E-01 | 3.1E-04 | 3.1E-04 | 2.7E-04 | 7.7E-04 | 7.7E-04 |
| 204421_s_at  | FGF2     | 5.0E-01 | 5.0E-01 | 5.0E-01 | 5.0E-01 | 1.7E-04 | 3.1E-04 | 8.8E-05 | 1.0E-04 | 1.3E-04 |
| 226621_at    | FGG      | 5.0E-01 | 6.6E-01 | 5.0E-01 | 2.7E-05 | 2.0E-05 | 2.0E-05 | 3.0E-05 | 2.0E-05 | 2.0E-05 |
| 243309_at    | FLJ27352 | 5.0E-01 | 6.8E-01 | 3.8E-01 | 3.5E-05 | 2.0E-05 | 2.3E-05 | 2.0E-05 | 2.0E-05 | 2.3E-05 |
| 229521_at    | FLJ36031 | 4.7E-02 | 5.0E-01 | 5.0E-01 | 3.2E-01 | 8.7E-04 | 4.9E-04 | 2.0E-05 | 2.7E-05 | 8.8E-05 |
| 239331_at    | FLJ43663 | 9.9E-01 | 7.9E-02 | 5.0E-01 | 2.7E-02 | 2.3E-05 | 3.0E-05 | 2.0E-05 | 2.0E-05 | 2.0E-05 |
| 219250_s_at  | FLRT3    | 5.0E-01 | 9.1E-01 | 5.0E-01 | 3.1E-02 | 2.0E-02 | 1.9E-04 | 4.0E-05 | 2.3E-05 | 2.3E-05 |
| 222853_at    | FLRT3    | 8.0E-01 | 9.1E-01 | 3.8E-01 | 5.5E-04 | 1.3E-04 | 9.7E-04 | 2.7E-05 | 1.0E-04 | 2.3E-05 |
| 1559060_a_at | FNIP1    | 9.9E-01 | 2.0E-02 | 6.5E-01 | 5.0E-01 | 8.7E-04 | 2.1E-04 | 4.6E-05 | 5.2E-05 | 4.9E-04 |
| 209189_at    | FOS      | 9.9E-01 | 9.9E-01 | 5.0E-01 | 2.0E-05 | 2.0E-05 | 2.0E-05 | 2.0E-05 | 2.0E-05 | 2.0E-05 |
| 202768_at    | FOSB     | 2.6E-01 | 9.1E-01 | 5.5E-01 | 2.0E-02 | 4.5E-03 | 1.5E-03 | 3.5E-05 | 6.2E-04 | 1.5E-03 |
| 204420_at    | FOSL1    | 7.2E-01 | 5.0E-01 | 3.0E-03 | 1.3E-04 | 2.0E-05 | 2.0E-05 | 2.0E-05 | 2.0E-05 | 2.0E-05 |
| 218880_at    | FOSL2    | 5.0E-01 | 1.8E-01 | 4.4E-02 | 2.0E-05 | 2.0E-05 | 2.0E-05 | 2.0E-05 | 2.0E-05 | 2.0E-05 |
| 225262_at    | FOSL2    | 5.0E-01 | 5.0E-01 | 4.1E-02 | 2.0E-05 | 2.3E-05 | 2.0E-05 | 2.0E-05 | 2.0E-05 | 2.7E-05 |
| 227475_at    | FOXQ1    | 5.0E-01 | 5.0E-01 | 2.9E-02 | 2.0E-05 | 2.0E-05 | 2.0E-05 | 2.0E-05 | 2.0E-05 | 2.0E-05 |
| 213056_at    | FRMD4B   | 5.0E-01 | 4.7E-01 | 5.0E-01 | 3.6E-02 | 7.8E-05 | 1.0E-04 | 2.0E-05 | 2.0E-05 | 7.8E-05 |
| 210220_at    | FZD2     | 2.1E-04 | 5.0E-01 | 1.0E+00 | 1.0E+00 | 1.0E+00 | 1.0E+00 | 1.0E+00 | 1.0E+00 | 1.0E+00 |
| 207574_s_at  | GADD45B  | 8.7E-01 | 9.7E-01 | 5.0E-01 | 5.0E-01 | 2.0E-05 | 4.9E-04 | 2.0E-05 | 2.0E-05 | 2.0E-05 |
| 209304_x_at  | GADD45B  | 9.3E-01 | 8.9E-01 | 5.0E-01 | 5.0E-01 | 2.0E-03 | 2.0E-05 | 2.0E-05 | 2.7E-05 | 6.8E-05 |
| 209305_s_at  | GADD45B  | 5.3E-01 | 5.0E-01 | 5.0E-01 | 5.6E-01 | 6.0E-05 | 1.1E-03 | 2.0E-05 | 2.3E-05 | 8.8E-05 |
| 213560_at    | GADD45B  | 6.0E-01 | 5.0E-01 | 4.9E-01 | 5.0E-01 | 4.8E-01 | 1.8E-02 | 2.7E-04 | 1.7E-03 | 3.1E-04 |
| 204457_s_at  | GAS1     | 5.0E-01 | 1.0E+00 | 1.0E+00 | 1.0E+00 | 1.0E+00 | 1.0E+00 | 1.0E+00 | 1.0E+00 | 1.0E+00 |
| 219508_at    | GCNT3    | 3.9E-01 | 5.0E-01 | 2.7E-01 | 5.0E-01 | 3.9E-04 | 2.3E-05 | 1.5E-04 | 3.5E-05 | 3.5E-05 |
| 221577_x_at  | GDF15    | 5.0E-01 | 7.7E-01 | 5.0E-01 | 2.0E-05 | 2.0E-05 | 2.0E-05 | 2.0E-05 | 2.0E-05 | 2.0E-05 |
| 204472_at    | GEM      | 5.0E-01 | 5.6E-01 | 4.3E-01 | 3.1E-04 | 2.0E-05 | 2.0E-05 | 2.0E-05 | 2.0E-05 | 2.0E-05 |
| 205100_at    | GFPT2    | 5.9E-03 | 2.4E-04 | 2.1E-01 | 5.0E-01 | 9.7E-04 | 2.1E-04 | 2.0E-05 | 2.0E-05 | 3.5E-05 |
| 204222_s_at  | GLIPR1   | 5.0E-01 | 5.0E-01 | 1.7E-02 | 2.0E-02 | 5.4E-03 | 7.1E-03 | 2.0E-05 | 6.0E-05 | 6.8E-05 |
| 226136_at    | GLIPR1   | 5.0E-01 | 6.2E-01 | 5.0E-01 | 5.0E-01 | 3.6E-02 | 7.1E-03 | 2.0E-05 | 1.7E-04 | 2.1E-04 |
| 226142_at    | GLIPR1   | 7.5E-01 | 7.4E-01 | 3.8E-02 | 2.7E-02 | 4.1E-02 | 2.8E-03 | 2.3E-05 | 2.0E-05 | 2.0E-05 |
| 223079_s_at  | GLS      | 5.0E-01 | 5.0E-01 | 6.9E-04 | 2.0E-05 | 2.0E-05 | 2.0E-05 | 2.0E-05 | 2.0E-05 | 2.0E-05 |
| 219936_s_at  | GPR87    | 5.0E-01 | 7.7E-01 | 1.9E-04 | 2.0E-05 | 2.0E-05 | 2.0E-05 | 2.0E-05 | 2.0E-05 | 2.0E-05 |
| 203108_at    | GPRC5A   | 5.0E-01 | 9.8E-01 | 2.0E-05 | 2.0E-05 | 2.0E-05 | 2.0E-05 | 2.0E-05 | 2.0E-05 | 2.0E-05 |
| 232290_at    | GPRC5A   | 7.6E-01 | 6.9E-01 | 5.8E-02 | 3.5E-04 | 5.2E-05 | 5.4E-02 | 2.3E-05 | 1.5E-04 | 1.8E-03 |
| 218706_s_at  | GRAMD3   | 5.0E-01 | 5.0E-01 | 5.0E-01 | 2.4E-01 | 2.0E-05 | 2.0E-05 | 2.0E-05 | 2.0E-05 | 2.0E-05 |
| 212434_at    | GRPEL1   | 5.0E-01 | 5.0E-01 | 3.7E-03 | 5.2E-05 | 2.0E-05 | 4.6E-05 | 2.0E-05 | 2.0E-05 | 2.0E-05 |
| 223541_at    | HAS3     | 1.5E-01 | 5.0E-01 | 8.7E-04 | 7.4E-02 | 1.8E-01 | 1.2E-02 | 6.8E-05 | 9.7E-04 | 9.7E-04 |



|              |           |         |         |         |         |         |         |         |         |         |         |
|--------------|-----------|---------|---------|---------|---------|---------|---------|---------|---------|---------|---------|
| 242396_at    | LOC644192 | 9.7E-01 | 7.6E-01 | 5.0E-01 | 9.6E-01 | 1.0E+00 | 1.0E+00 | 1.0E+00 | 1.0E+00 | 1.0E+00 | 1.0E+00 |
| 1555978_s_at | LOC727918 | 5.0E-01 | 5.0E-01 | 5.0E-01 | 5.0E-01 | 1.9E-04 | 4.4E-04 | 1.5E-04 | 2.0E-05 | 4.0E-05 |         |
| 217122_s_at  | LOC728661 | 5.0E-01 | 5.0E-01 | 5.0E-01 | 9.9E-01 | 1.0E+00 | 1.0E+00 | 1.0E+00 | 1.0E+00 | 1.0E+00 | 1.0E+00 |
| 239343_at    | LOC728705 | 5.0E-01 | 5.0E-01 | 6.2E-01 | 1.0E+00 | 1.0E+00 | 1.0E+00 | 1.0E+00 | 1.0E+00 | 1.0E+00 | 1.0E+00 |
| 228536_at    | LOC90826  | 5.6E-01 | 5.0E-01 | 7.8E-03 | 2.4E-04 | 4.0E-05 | 3.5E-05 | 2.3E-05 | 3.0E-05 | 2.3E-05 |         |
| 223533_at    | LRRRC8C   | 5.0E-01 | 5.0E-01 | 1.4E-01 | 1.8E-01 | 4.9E-04 | 2.3E-05 | 2.0E-05 | 2.0E-05 | 2.0E-05 | 2.0E-05 |
| 218559_s_at  | MAFB      | 8.8E-01 | 2.9E-02 | 9.9E-01 | 9.2E-01 | 2.5E-02 | 1.2E-02 | 2.0E-05 | 2.0E-05 | 2.0E-05 | 2.1E-04 |
| 205193_at    | MAFF      | 5.0E-01 | 5.0E-01 | 2.4E-04 | 2.0E-05 | 2.3E-05 | 5.2E-05 | 2.0E-05 | 2.3E-05 | 2.0E-05 |         |
| 36711_at     | MAFF      | 5.7E-01 | 1.8E-02 | 0.0E+00 | 0.0E+00 | 0.0E+00 | 0.0E+00 | 0.0E+00 | 0.0E+00 | 0.0E+00 | 0.0E+00 |
| 206750_at    | MAFK      | 4.8E-01 | 5.0E-01 | 4.8E-01 | 1.3E-04 | 5.5E-04 | 3.5E-04 | 3.0E-05 | 4.6E-05 | 1.3E-04 |         |
| 226206_at    | MAFK      | 9.7E-01 | 9.4E-01 | 4.4E-04 | 2.0E-05 | 2.0E-05 | 2.0E-05 | 2.0E-05 | 2.0E-05 | 2.3E-05 |         |
| 224480_s_at  | MAG1      | 7.7E-01 | 9.3E-01 | 6.8E-01 | 5.0E-01 | 2.0E-05 | 3.5E-04 | 1.1E-04 | 2.0E-05 | 1.5E-04 |         |
| 205027_s_at  | MAP3K8    | 5.0E-01 | 6.0E-01 | 4.9E-01 | 2.0E-05 | 4.0E-05 | 2.0E-05 | 2.0E-05 | 2.0E-05 | 3.0E-05 |         |
| 235421_at    | MAP3K8    | 5.3E-01 | 3.3E-02 | 1.8E-01 | 4.7E-01 | 4.9E-04 | 1.8E-02 | 2.0E-05 | 1.7E-04 | 3.9E-04 |         |
| 236067_at    | MBNL2     | 5.0E-01 | 5.0E-01 | 2.7E-01 | 3.4E-01 | 4.9E-04 | 1.1E-04 | 4.6E-05 | 1.3E-04 | 2.4E-04 |         |
| 236699_at    | MBNL2     | 1.0E+00 | 5.0E-01 | 5.0E-01 | 2.1E-02 | 2.0E-05 | 6.2E-04 | 2.0E-05 | 2.0E-05 | 2.0E-05 |         |
| 200796_s_at  | MCL1      | 5.0E-01 | 5.0E-01 | 8.5E-03 | 3.0E-05 | 2.3E-05 | 2.0E-05 | 2.0E-05 | 2.3E-05 | 3.5E-05 |         |
| 200797_s_at  | MCL1      | 5.0E-01 | 5.0E-01 | 1.2E-03 | 1.0E-04 | 2.0E-05 | 2.0E-05 | 2.0E-05 | 2.0E-05 | 2.0E-05 |         |
| 200798_x_at  | MCL1      | 5.0E-01 | 5.0E-01 | 6.0E-05 | 2.0E-05 | 2.0E-05 | 2.0E-05 | 2.0E-05 | 2.0E-05 | 2.0E-05 |         |
| 214056_at    | MCL1      | 9.9E-01 | 5.0E-01 | 5.0E-01 | 2.7E-04 | 2.0E-05 | 3.0E-05 | 3.0E-05 | 2.7E-05 | 2.0E-05 |         |
| 214057_at    | MCL1      | 5.7E-01 | 5.0E-01 | 5.0E-01 | 3.3E-02 | 5.2E-05 | 2.0E-05 | 1.7E-04 | 2.0E-05 | 2.0E-05 |         |
| 227175_at    | MCL1      | 5.2E-01 | 5.0E-01 | 5.0E-01 | 1.5E-01 | 4.4E-04 | 1.8E-02 | 3.9E-04 | 4.6E-05 | 9.7E-04 |         |
| 212830_at    | MEGF9     | 9.8E-01 | 1.0E+00 | 9.5E-01 | 5.0E-01 | 1.0E+00 | 1.0E+00 | 1.0E+00 | 1.0E+00 | 1.0E+00 |         |
| 214696_at    | MGC14376  | 8.0E-01 | 1.0E+00 | 5.4E-02 | 2.1E-04 | 8.8E-05 | 5.2E-05 | 2.0E-05 | 2.0E-05 | 6.0E-05 |         |
| 221477_s_at  | MGC5618   | 2.3E-05 | 2.0E-05 | 4.0E-05 | 3.5E-05 | 2.0E-05 | 2.0E-05 | 3.5E-05 | 2.0E-05 | 2.0E-05 |         |
| 239549_at    | M-RIP     | 9.7E-01 | 5.0E-01 | 7.4E-02 | 2.4E-01 | 1.2E-03 | 1.0E-01 | 4.6E-05 | 2.7E-04 | 1.9E-04 |         |
| 1570588_at   | M-RIP     | 8.5E-01 | 4.4E-01 | 5.0E-01 | 4.7E-02 | 1.3E-03 | 1.2E-01 | 6.8E-05 | 2.7E-04 | 1.5E-03 |         |
| 217165_x_at  | MT1F      | 5.0E-01 | 3.7E-01 | 1.3E-01 | 3.4E-01 | 7.7E-04 | 2.3E-03 | 1.1E-04 | 3.9E-04 | 2.0E-05 |         |
| 211456_x_at  | MT1P2     | 5.0E-01 | 5.0E-01 | 1.0E-02 | 5.0E-01 | 2.7E-04 | 1.1E-04 | 1.3E-04 | 2.4E-04 | 3.5E-05 |         |
| 204326_x_at  | MT1X      | 5.0E-01 | 5.0E-01 | 1.0E-01 | 3.7E-01 | 2.3E-02 | 6.8E-05 | 2.0E-05 | 2.3E-03 | 3.0E-05 |         |
| 208581_x_at  | MT1X      | 5.0E-01 | 5.0E-01 | 4.4E-04 | 2.2E-01 | 3.5E-04 | 1.3E-04 | 6.8E-05 | 8.8E-05 | 6.0E-05 |         |
| 212185_x_at  | MT2A      | 5.0E-01 | 1.1E-01 | 1.1E-03 | 5.0E-01 | 2.0E-05 | 2.0E-05 | 2.0E-05 | 2.0E-05 | 2.0E-05 |         |
| 225344_at    | NCOA7     | 4.5E-01 | 5.0E-01 | 5.0E-01 | 2.0E-05 | 2.0E-05 | 2.0E-05 | 2.0E-05 | 2.0E-05 | 2.0E-05 |         |
| 203574_at    | NFIL3     | 5.0E-01 | 1.0E+00 | 1.0E+00 | 2.0E-05 | 2.0E-05 | 2.0E-05 | 2.0E-05 | 2.0E-05 | 2.0E-05 |         |
| 201502_s_at  | NFKBIA    | 9.3E-03 | 5.0E-01 | 1.7E-01 | 2.0E-05 | 5.9E-03 | 2.0E-05 | 2.0E-05 | 2.0E-05 | 2.0E-05 |         |
| 223217_s_at  | NFKBIZ    | 5.0E-01 | 5.0E-01 | 1.8E-02 | 2.3E-05 | 2.0E-05 | 2.0E-05 | 2.0E-05 | 2.0E-05 | 2.0E-05 |         |
| 223218_s_at  | NFKBIZ    | 9.6E-01 | 5.0E-01 | 7.1E-03 | 2.0E-05 | 2.0E-05 | 2.0E-05 | 2.0E-05 | 2.0E-05 | 2.0E-05 |         |
| 202585_s_at  | NFX1      | 5.0E-01 | 8.1E-01 | 8.9E-01 | 9.9E-01 | 9.9E-01 | 1.0E+00 | 1.0E+00 | 1.0E+00 | 1.0E+00 |         |
| 202237_at    | NNMT      | 5.0E-01 | 5.0E-01 | 5.0E-01 | 1.9E-04 | 2.0E-05 | 2.0E-05 | 2.3E-05 | 2.0E-05 | 2.0E-05 |         |
| 202238_s_at  | NNMT      | 5.0E-01 | 5.0E-01 | 5.0E-01 | 6.0E-05 | 2.0E-05 | 2.0E-05 | 2.0E-05 | 2.0E-05 | 2.0E-05 |         |
| 231798_at    | NOG       | 5.0E-01 | 9.3E-01 | 9.3E-01 | 9.3E-01 | 1.0E+00 | 1.0E+00 | 1.0E+00 | 1.0E+00 | 1.0E+00 |         |
| 244855_at    | NQO2      | 5.0E-01 | 8.5E-01 | 4.3E-01 | 4.8E-01 | 1.5E-01 | 2.3E-03 | 8.7E-04 | 9.7E-04 | 2.5E-03 |         |
| 202340_x_at  | NR4A1     | 5.0E-01 | 5.0E-01 | 1.5E-01 | 2.4E-04 | 2.0E-05 | 2.0E-05 | 2.0E-05 | 4.6E-05 | 2.0E-05 |         |
| 204621_s_at  | NR4A2     | 1.0E+00 | 1.0E+00 | 5.0E-01 | 7.8E-05 | 1.0E-04 | 8.8E-05 | 2.0E-05 | 1.3E-04 | 7.8E-05 |         |
| 235739_at    | NR4A2     | 3.5E-01 | 5.0E-01 | 5.0E-01 | 1.6E-01 | 4.0E-05 | 2.0E-05 | 2.0E-05 | 5.2E-05 | 2.0E-05 |         |
| 207978_s_at  | NR4A3     | 8.8E-01 | 1.0E+00 | 6.2E-01 | 1.5E-04 | 2.0E-05 | 2.0E-05 | 2.0E-05 | 2.0E-05 | 2.3E-05 |         |
| 209959_at    | NR4A3     | 9.9E-01 | 6.7E-01 | 5.0E-01 | 4.9E-04 | 4.0E-05 | 2.1E-04 | 2.3E-05 | 2.3E-05 | 6.8E-05 |         |
| 204435_at    | NUPL1     | 1.0E+00 | 4.5E-01 | 1.1E-04 | 2.3E-05 | 2.0E-05 | 2.3E-05 | 2.0E-05 | 2.0E-05 | 2.0E-05 |         |
| 219334_s_at  | OBFC2A    | 8.1E-01 | 7.5E-01 | 5.0E-01 | 5.0E-01 | 4.9E-03 | 2.7E-04 | 1.1E-04 | 2.4E-04 | 2.4E-04 |         |
| 222872_x_at  | OBFC2A    | 5.0E-01 | 7.3E-01 | 5.0E-01 | 2.1E-04 | 2.3E-05 | 2.0E-05 | 2.0E-05 | 2.0E-05 | 2.0E-05 |         |
| 233085_s_at  | OBFC2A    | 9.9E-01 | 5.0E-01 | 5.0E-01 | 7.8E-03 | 2.0E-05 | 2.0E-05 | 2.0E-05 | 2.0E-05 | 2.0E-05 |         |
| 205729_at    | OSMR      | 5.0E-01 | 6.0E-01 | 5.0E-01 | 2.7E-05 | 4.0E-05 | 2.0E-05 | 6.0E-05 | 6.8E-05 | 2.0E-05 |         |
| 226140_s_at  | OTUD1     | 2.4E-01 | 5.0E-01 | 5.0E-01 | 2.0E-05 | 1.9E-04 | 3.1E-04 | 2.0E-05 | 2.0E-05 | 2.0E-05 |         |
| 243296_at    | PBEF1     | 9.9E-01 | 3.3E-01 | 7.5E-01 | 5.0E-01 | 2.0E-05 | 1.1E-04 | 2.0E-05 | 2.0E-05 | 2.0E-05 |         |
| 205534_at    | PCDH7     | 5.0E-01 | 2.2E-01 | 5.0E-01 | 5.0E-01 | 2.0E-05 | 3.5E-05 | 2.0E-05 | 2.3E-05 | 2.0E-05 |         |
| 205535_s_at  | PCDH7     | 5.0E-01 | 1.6E-01 | 5.6E-01 | 5.0E-01 | 1.7E-02 | 4.5E-03 | 3.5E-04 | 2.3E-05 | 2.0E-05 |         |
| 232382_s_at  | PCMTD1    | 5.0E-01 | 5.0E-01 | 5.0E-01 | 5.0E-01 | 1.0E+00 | 9.8E-01 | 1.0E+00 | 1.0E+00 | 1.0E+00 |         |
| 238902_at    | PCMTD1    | 8.4E-01 | 5.0E-01 | 5.0E-01 | 7.8E-01 | 1.0E+00 | 1.0E+00 | 1.0E+00 | 1.0E+00 | 1.0E+00 |         |
| 230109_at    | PDE7B     | 7.2E-01 | 1.0E+00 | 9.7E-01 | 9.9E-01 | 1.0E+00 | 1.0E+00 | 1.0E+00 | 1.0E+00 | 1.0E+00 |         |
| 202464_s_at  | PFKFB3    | 5.0E-01 | 5.0E-01 | 5.0E-01 | 2.1E-01 | 4.0E-01 | 4.0E-05 | 2.0E-05 | 2.7E-05 | 5.2E-05 |         |
| 217996_at    | PHLDA1    | 1.0E+00 | 5.0E-01 | 2.0E-05 | 4.0E-05 | 2.0E-05 | 2.0E-05 | 2.0E-05 | 2.0E-05 | 2.0E-05 |         |
| 217997_at    | PHLDA1    | 1.0E+00 | 8.0E-01 | 2.0E-05 | 3.1E-02 | 2.0E-05 | 2.0E-05 | 2.0E-05 | 2.0E-05 | 2.0E-05 |         |
| 218000_s_at  | PHLDA1    | 9.6E-01 | 1.6E-01 | 1.1E-04 | 2.0E-05 | 2.0E-05 | 2.0E-05 | 2.0E-05 | 2.0E-05 | 2.0E-05 |         |
| 225842_at    | PHLDA1    | 5.0E-01 | 9.0E-01 | 6.2E-02 | 4.4E-02 | 5.5E-04 | 2.0E-05 | 2.3E-05 | 2.0E-05 | 3.0E-05 |         |
| 239102_s_at  | PICALM    | 9.7E-01 | 2.0E-01 | 5.5E-04 | 2.0E-03 | 6.9E-04 | 7.9E-02 | 4.0E-05 | 8.8E-05 | 2.4E-04 |         |
| 210845_s_at  | PLAUR     | 8.8E-01 | 6.3E-01 | 5.0E-01 | 6.5E-03 | 2.1E-04 | 2.3E-05 | 2.0E-05 | 2.0E-05 | 2.0E-05 |         |
| 211924_s_at  | PLAUR     | 5.0E-01 | 5.0E-01 | 4.4E-02 | 1.8E-01 | 1.7E-03 | 6.2E-04 | 2.0E-05 | 3.0E-05 | 1.3E-04 |         |

|              |          |         |         |         |         |         |         |         |         |         |
|--------------|----------|---------|---------|---------|---------|---------|---------|---------|---------|---------|
| 1558836_at   | PLGLB1   | 5.0E-01 | 4.9E-01 | 5.0E-01 | 5.0E-01 | 6.0E-05 | 1.7E-02 | 2.0E-05 | 2.0E-05 | 1.0E-04 |
| 204285_s_at  | PMAIP1   | 9.9E-01 | 5.0E-01 | 5.0E-01 | 3.0E-05 | 2.0E-05 | 2.0E-05 | 2.0E-05 | 2.0E-05 | 2.0E-05 |
| 204286_s_at  | PMAIP1   | 9.2E-01 | 1.0E+00 | 5.0E-01 | 3.5E-04 | 4.0E-05 | 3.0E-05 | 3.0E-05 | 3.5E-05 | 2.0E-05 |
| 1554609_at   | POLD3    | 5.0E-01 | 9.2E-01 | 1.0E+00 | 1.0E+00 | 1.0E+00 | 1.0E+00 | 1.0E+00 | 1.0E+00 | 1.0E+00 |
| 212226_s_at  | PPAP2B   | 5.0E-01 | 5.0E-01 | 9.3E-01 | 5.0E-01 | 7.8E-05 | 2.0E-05 | 2.0E-05 | 2.3E-05 | 2.0E-05 |
| 212230_at    | PPAP2B   | 5.0E-01 | 9.6E-01 | 6.7E-01 | 5.0E-01 | 4.9E-04 | 1.7E-04 | 2.0E-05 | 2.0E-05 | 2.0E-05 |
| 218273_s_at  | PPM2C    | 5.0E-01 | 5.0E-01 | 5.0E-01 | 1.1E-01 | 1.7E-04 | 3.0E-05 | 3.0E-05 | 2.7E-05 | 2.0E-05 |
| 222572_at    | PPM2C    | 5.0E-01 | 5.0E-01 | 5.0E-01 | 2.0E-02 | 2.0E-05 | 3.0E-05 | 2.0E-05 | 2.0E-05 | 2.0E-05 |
| 202014_at    | PPP1R15A | 5.0E-01 | 5.0E-01 | 2.4E-01 | 1.7E-03 | 1.7E-04 | 2.0E-05 | 2.0E-05 | 5.2E-05 | 2.7E-05 |
| 37028_at     | PPP1R15A | 2.8E-01 | 7.8E-02 | 5.0E-01 | 4.0E-03 | 1.0E-06 | 0.0E+00 | 0.0E+00 | 0.0E+00 | 0.0E+00 |
| 224692_at    | PPP1R15B | 5.0E-01 | 5.0E-01 | 4.8E-01 | 2.0E-05 | 2.0E-05 | 2.0E-05 | 2.0E-05 | 2.0E-05 | 2.0E-05 |
| 1552670_a_at | PPP1R3B  | 3.4E-01 | 5.0E-01 | 5.0E-01 | 3.0E-01 | 5.0E-01 | 2.1E-02 | 2.0E-05 | 4.0E-05 | 3.9E-04 |
| 225066_at    | PPP2R2D  | 6.7E-01 | 1.5E-01 | 5.5E-04 | 1.7E-01 | 3.0E-03 | 3.2E-01 | 2.0E-05 | 2.0E-05 | 7.8E-05 |
| 201594_s_at  | PPP4R1   | 5.0E-01 | 8.5E-01 | 4.8E-01 | 1.7E-02 | 1.0E-04 | 2.3E-05 | 2.0E-05 | 2.0E-05 | 2.0E-05 |
| 227510_x_at  | PRO1073  | 1.0E+00 | 8.8E-05 | 2.2E-01 | 5.0E-01 | 7.8E-05 | 2.7E-05 | 2.0E-05 | 2.3E-05 | 2.0E-05 |
| 209586_s_at  | PRUNE    | 5.0E-01 | 5.0E-01 | 5.0E-01 | 5.0E-01 | 1.0E+00 | 1.0E+00 | 1.0E+00 | 1.0E+00 | 1.0E+00 |
| 210988_s_at  | PRUNE    | 5.0E-01 | 7.2E-01 | 5.0E-01 | 5.0E-01 | 1.0E+00 | 1.0E+00 | 1.0E+00 | 1.0E+00 | 1.0E+00 |
| 204748_at    | PTGS2    | 2.0E-03 | 1.2E-03 | 4.6E-05 | 2.0E-05 | 2.0E-05 | 2.0E-05 | 2.0E-05 | 2.0E-05 | 2.0E-05 |
| 1554997_a_at | PTGS2    | 4.1E-02 | 2.5E-03 | 1.7E-04 | 2.0E-05 | 2.0E-05 | 2.0E-05 | 2.0E-05 | 2.0E-05 | 2.0E-05 |
| 208965_s_at  | PYHIN1   | 2.7E-01 | 5.0E-01 | 5.0E-01 | 4.5E-01 | 3.9E-04 | 1.5E-04 | 2.0E-05 | 1.0E-04 | 4.0E-05 |
| 1557432_at   | RASAL2   | 7.7E-01 | 5.8E-01 | 5.0E-01 | 8.0E-01 | 7.8E-03 | 5.0E-01 | 2.0E-05 | 6.2E-04 | 2.4E-04 |
| 223467_at    | RASD1    | 5.8E-01 | 1.0E+00 | 1.3E-01 | 8.8E-05 | 1.1E-02 | 2.0E-05 | 2.0E-05 | 3.9E-04 | 1.0E-04 |
| 1568768_s_at | RBKS     | 9.0E-01 | 5.0E-01 | 1.0E-04 | 2.0E-05 | 2.0E-05 | 2.0E-05 | 2.0E-05 | 2.0E-05 | 2.0E-05 |
| 228455_at    | RBM15    | 1.0E+00 | 5.0E-01 | 5.0E-01 | 1.0E+00 | 1.0E+00 | 1.0E+00 | 1.0E+00 | 1.0E+00 | 1.0E+00 |
| 202388_at    | RGS2     | 1.0E+00 | 1.0E+00 | 5.0E-01 | 1.0E+00 | 2.0E-05 | 2.0E-05 | 2.0E-05 | 2.0E-05 | 2.0E-05 |
| 212099_at    | RHOB     | 7.7E-01 | 1.0E+00 | 5.0E-01 | 2.0E-05 | 2.0E-05 | 2.0E-05 | 2.0E-05 | 2.0E-05 | 2.0E-05 |
| 1553962_s_at | RHOB     | 8.2E-01 | 1.0E+00 | 3.4E-01 | 2.0E-05 | 2.0E-05 | 2.0E-05 | 2.0E-05 | 2.0E-05 | 2.0E-05 |
| 223168_at    | RHOU     | 5.0E-01 | 5.0E-01 | 1.0E+00 | 1.0E+00 | 1.0E+00 | 1.0E+00 | 1.0E+00 | 1.0E+00 | 1.0E+00 |
| 229285_at    | RNASEL   | 3.4E-01 | 5.0E-01 | 8.3E-01 | 1.0E+00 | 1.0E+00 | 1.0E+00 | 1.0E+00 | 1.0E+00 | 1.0E+00 |
| 212724_at    | RND3     | 1.0E+00 | 1.0E+00 | 5.0E-01 | 5.0E-01 | 2.5E-03 | 2.0E-05 | 2.0E-05 | 2.0E-05 | 2.0E-05 |
| 236114_at    | RUNX1    | 7.3E-01 | 4.5E-01 | 5.0E-01 | 5.0E-01 | 2.0E-05 | 2.7E-04 | 7.8E-05 | 2.7E-05 | 7.7E-04 |
| 238909_at    | S100A10  | 1.0E+00 | 9.8E-01 | 5.0E-01 | 8.4E-02 | 2.0E-05 | 3.0E-05 | 2.0E-05 | 2.0E-05 | 2.0E-05 |
| 204268_at    | S100A2   | 5.0E-01 | 5.0E-01 | 1.9E-01 | 1.2E-01 | 7.8E-05 | 2.0E-05 | 2.0E-05 | 2.0E-05 | 2.0E-05 |
| 228923_at    | S100A6   | 4.0E-01 | 4.3E-01 | 3.5E-01 | 3.0E-03 | 3.0E-05 | 2.3E-05 | 1.1E-04 | 1.0E-04 | 7.8E-05 |
| 203455_s_at  | SAT1     | 5.0E-01 | 3.5E-04 | 2.0E-05 | 2.0E-05 | 2.0E-05 | 2.0E-05 | 2.0E-05 | 2.0E-05 | 2.0E-05 |
| 210592_s_at  | SAT1     | 2.5E-02 | 2.0E-05 | 2.3E-05 | 2.0E-05 | 2.0E-05 | 2.0E-05 | 2.0E-05 | 2.0E-05 | 2.0E-05 |
| 213988_s_at  | SAT1     | 3.6E-02 | 1.3E-03 | 4.6E-05 | 2.7E-05 | 2.3E-05 | 2.7E-05 | 2.0E-05 | 2.0E-05 | 2.7E-05 |
| 230333_at    | SAT1     | 2.0E-05 | 2.0E-05 | 2.0E-05 | 2.0E-05 | 2.0E-05 | 2.0E-05 | 2.0E-05 | 2.0E-05 | 2.0E-05 |
| 235147_at    | SATB2    | 9.8E-01 | 5.0E-01 | 1.0E+00 | 1.0E+00 | 9.9E-01 | 1.0E+00 | 1.0E+00 | 1.0E+00 | 1.0E+00 |
| 202071_at    | SDC4     | 5.0E-01 | 4.8E-01 | 5.0E-01 | 2.3E-03 | 1.7E-04 | 3.0E-05 | 2.3E-05 | 2.0E-05 | 2.0E-05 |
| 234725_s_at  | SEMA4B   | 3.7E-01 | 5.0E-01 | 5.0E-01 | 5.0E-01 | 3.9E-04 | 7.7E-04 | 8.8E-05 | 2.0E-05 | 4.0E-05 |
| 228398_at    | SENP8    | 5.0E-01 | 8.1E-01 | 6.9E-01 | 9.9E-01 | 1.0E+00 | 1.0E+00 | 1.0E+00 | 1.0E+00 | 1.0E+00 |
| 1552684_a_at | SENP8    | 5.0E-01 | 5.0E-01 | 6.6E-01 | 9.3E-01 | 1.0E+00 | 1.0E+00 | 1.0E+00 | 1.0E+00 | 1.0E+00 |
| 1558937_s_at | SERF1A   | 1.0E+00 | 5.0E-01 | 8.1E-01 | 1.0E+00 | 1.0E+00 | 1.0E+00 | 1.0E+00 | 1.0E+00 | 1.0E+00 |
| 239213_at    | SERPINB1 | 3.9E-01 | 5.0E-01 | 5.0E-01 | 6.3E-01 | 5.9E-03 | 4.1E-02 | 4.4E-04 | 2.7E-04 | 4.6E-05 |
| 209719_x_at  | SERPINB3 | 1.9E-04 | 5.1E-02 | 1.8E-01 | 3.3E-02 | 2.0E-05 | 2.0E-05 | 2.0E-05 | 2.0E-05 | 2.0E-05 |
| 209720_s_at  | SERPINB3 | 6.5E-01 | 4.1E-02 | 4.1E-02 | 6.8E-05 | 2.0E-05 | 2.0E-05 | 2.0E-05 | 2.0E-05 | 2.0E-05 |
| 210413_x_at  | SERPINB4 | 1.8E-01 | 4.7E-01 | 2.3E-01 | 2.0E-02 | 4.6E-05 | 2.3E-05 | 2.0E-05 | 3.0E-05 | 2.0E-05 |
| 211906_s_at  | SERPINB4 | 3.4E-01 | 7.4E-02 | 6.3E-01 | 5.0E-01 | 2.0E-05 | 2.0E-05 | 2.0E-05 | 2.0E-05 | 2.0E-05 |
| 223394_at    | SERTAD1  | 2.1E-01 | 5.0E-01 | 1.2E-03 | 2.7E-04 | 2.0E-05 | 2.0E-05 | 2.0E-05 | 2.0E-05 | 2.0E-05 |
| 202656_s_at  | SERTAD2  | 5.0E-01 | 5.0E-01 | 5.0E-01 | 5.0E-01 | 2.0E-05 | 2.7E-05 | 2.0E-05 | 2.0E-05 | 2.0E-05 |
| 202657_s_at  | SERTAD2  | 5.0E-01 | 5.0E-01 | 5.0E-01 | 3.9E-04 | 2.0E-05 | 2.0E-05 | 2.0E-05 | 2.0E-05 | 2.0E-05 |
| 223196_s_at  | SESN2    | 6.1E-01 | 5.0E-01 | 5.0E-01 | 5.0E-01 | 8.5E-01 | 8.2E-01 | 7.8E-05 | 1.7E-04 | 1.2E-03 |
| 209260_at    | SFN      | 5.0E-01 | 5.0E-01 | 5.0E-01 | 1.5E-04 | 2.0E-05 | 2.0E-05 | 2.0E-05 | 2.0E-05 | 2.0E-05 |
| 33323_r_at   | SFN      | 5.0E-01 | 5.0E-01 | 5.0E-01 | 5.0E-01 | 0.0E+00 | 0.0E+00 | 0.0E+00 | 0.0E+00 | 0.0E+00 |
| 201739_at    | SGK      | 9.9E-01 | 1.0E+00 | 5.0E-01 | 2.7E-05 | 2.0E-05 | 2.0E-05 | 2.0E-05 | 2.0E-05 | 2.0E-05 |
| 242963_at    | SGMS2    | 5.0E-01 | 5.0E-01 | 5.0E-01 | 2.5E-03 | 5.2E-05 | 2.0E-05 | 2.0E-05 | 2.3E-05 | 2.0E-05 |
| 1569263_at   | SLC16A3  | 7.0E-02 | 2.6E-01 | 6.1E-01 | 5.0E-01 | 2.1E-04 | 6.2E-04 | 2.0E-05 | 3.5E-05 | 6.2E-04 |
| 230494_at    | SLC20A1  | 1.0E+00 | 5.0E-01 | 7.4E-02 | 3.6E-02 | 2.0E-05 | 2.0E-05 | 2.0E-05 | 2.0E-05 | 2.0E-05 |
| 239474_at    | SLC6A6   | 5.0E-01 | 2.8E-03 | 2.7E-02 | 2.9E-02 | 6.0E-05 | 7.4E-02 | 3.5E-05 | 2.7E-05 | 2.0E-03 |
| 223666_at    | SNX5     | 5.0E-01 | 5.0E-01 | 3.3E-01 | 1.2E-03 | 7.8E-05 | 2.0E-05 | 1.5E-04 | 2.3E-05 | 5.2E-05 |
| 203372_s_at  | SOCS2    | 7.0E-01 | 9.6E-01 | 5.0E-01 | 9.7E-01 | 8.5E-03 | 4.5E-03 | 2.0E-05 | 2.0E-05 | 6.8E-05 |
| 203373_at    | SOCS2    | 7.3E-01 | 1.0E+00 | 5.0E-01 | 5.8E-01 | 2.8E-01 | 4.0E-05 | 2.0E-05 | 2.7E-05 | 2.0E-05 |
| 206359_at    | SOCS3    | 5.0E-01 | 9.4E-01 | 5.0E-01 | 1.1E-03 | 6.0E-05 | 1.9E-04 | 8.8E-05 | 1.3E-04 | 7.8E-05 |
| 206360_s_at  | SOCS3    | 5.0E-01 | 5.0E-01 | 5.0E-01 | 2.0E-03 | 1.5E-02 | 1.1E-02 | 1.5E-04 | 1.3E-04 | 2.7E-04 |
| 227697_at    | SOCS3    | 9.7E-01 | 1.0E+00 | 5.0E-01 | 2.0E-05 | 2.0E-05 | 2.0E-05 | 2.0E-05 | 2.0E-05 | 2.0E-05 |
| 215078_at    | SOD2     | 1.8E-01 | 2.0E-01 | 4.5E-01 | 6.2E-04 | 2.0E-05 | 2.0E-05 | 2.0E-05 | 5.2E-05 | 2.0E-05 |
