# Supplementary material for: Salmonella Typhimurium Type III Secretion Effectors Stimulate Innate Immune Responses in Cultured Epithelial Cells
Source: PLoS Pathog. 2009 Aug 7;5(8):e1000538. doi: 10.1371/journal.ppat.1000538 (PMC2714975; doi:10.1371/journal.ppat.1000538)
Supplement: Table S3 — List of genes stimulated by S. typhimurium (2 fold or more) that were also stimulated by other pathogens or agonists of the innate immune system. (0.05 MB PDF) [file ppat.1000538.s008.pdf]

**Table S3: List of genes stimulated by *S. typhimurium* (2 fold or more) that were also stimulated by other pathogens or agonists of the innate immune system**

| Gene Symbol                 | Shigella flexneri(11,12) | Helicobacter pylori(1) | Yersinia enterocolitica(2) | Bordetella pertussis (4) | Pseudomonas aeruginosa (3,8) | Staphylococcus aureus(9)      | Staphylococcus aureus(6) | Toxoplasma gondii(7) | Legionella pneumophila(10) | Different bacteria or bacterial components(5) | Core(15) |
|-----------------------------|--------------------------|------------------------|----------------------------|--------------------------|------------------------------|-------------------------------|--------------------------|----------------------|----------------------------|-----------------------------------------------|----------|
| Caco-2                      | Gastric epithelial cells | HeLa                   | Lung Epithelial cells      | lung carcinoma cell line | HUVEC                        | Human airway epithelial cells | Human foreskin broblasts | Macrophages          | Macrophages                | Macrv                                         |          |
| CCL2 (MCP-1)                |                          |                        | X                          | X                        | X                            | X                             |                          | X                    | X                          | X                                             |          |
| CCL22 (MIP2a, GRO2)         | X                        |                        | X                          | X                        | X                            |                               | X                        | X                    | X                          | X                                             |          |
| GEM                         |                          |                        | X                          |                          | X                            |                               |                          | X                    |                            | X                                             |          |
| FOS                         | X                        | X                      |                            |                          | X                            |                               | X                        | X                    |                            | X                                             |          |
| JUN                         | X                        |                        | X                          |                          | X                            |                               | X                        |                      |                            | X                                             |          |
| EGR1                        | X                        |                        | X                          |                          |                              |                               | X                        |                      |                            |                                               |          |
| ZFP36                       | X                        |                        |                            |                          | X                            |                               |                          | X                    | X                          | X                                             |          |
| SOD2                        |                          |                        | X                          |                          |                              |                               | X                        | X                    | X                          | X                                             |          |
| AREG /// LOC653193          | X                        |                        |                            |                          | X                            | X                             |                          | X                    | X                          | X                                             |          |
| IL8                         | X                        |                        | X                          | X                        | X                            | X                             |                          | X                    | X                          | X                                             |          |
| DUSP8                       | X                        | X                      |                            |                          |                              |                               |                          | X                    | X                          | X                                             |          |
| CXCL3 (MIP2b, GRO3)         | X                        |                        | X                          | X                        | X                            | X                             |                          | X                    | X                          | X                                             |          |
| CEBPD                       |                          |                        | X                          |                          |                              |                               |                          | X                    |                            | X                                             |          |
| ID1                         | X                        |                        |                            |                          |                              |                               |                          |                      |                            |                                               |          |
| KLF6 (COPEB)                | X                        | X                      | X                          |                          | X                            |                               |                          |                      |                            | X                                             |          |
| ADM                         |                          |                        |                            |                          | X                            |                               |                          |                      | X                          | X                                             |          |
| AXUD1                       |                          |                        | X                          |                          |                              |                               |                          | X                    |                            |                                               |          |
| PTGS2                       | X                        |                        |                            | X                        |                              | X                             |                          |                      | X                          | X                                             |          |
| SERPINB1                    | X                        |                        | X                          |                          | X                            |                               |                          | X                    |                            | X                                             |          |
| ATF3                        | X                        | X                      | X                          |                          |                              |                               |                          | X                    |                            | X                                             |          |
| EREG                        | X                        |                        |                            |                          | X                            |                               |                          | X                    |                            |                                               |          |
| FGF                         |                          |                        |                            |                          |                              |                               |                          |                      |                            |                                               |          |
| FOSL1                       |                          | X                      | X                          |                          |                              |                               |                          |                      |                            |                                               |          |
| IL11                        |                          |                        | X                          |                          | X                            |                               |                          |                      |                            | X                                             |          |
| DUSP5                       | X                        |                        | X                          |                          |                              |                               |                          | X                    | X                          | X                                             |          |
| SAT                         |                          |                        |                            |                          |                              |                               |                          |                      |                            | X                                             |          |
| JUNB                        | X                        |                        | X                          |                          | X                            | X                             | X                        |                      | X                          | X                                             |          |
| MAFB                        |                          |                        |                            |                          |                              |                               |                          | X                    |                            |                                               |          |
| MAFF                        |                          |                        | X                          |                          |                              |                               |                          | X                    |                            |                                               |          |
| CYLR61                      | X                        |                        | X                          |                          |                              |                               |                          |                      |                            |                                               |          |
| GADD45B                     |                          |                        |                            |                          |                              |                               |                          | X                    |                            |                                               |          |
| CTGF                        | X                        |                        | X                          |                          |                              |                               |                          |                      |                            |                                               |          |
| IL1A                        |                          |                        | X                          |                          |                              | X                             |                          | X                    |                            | X                                             |          |
| ISG20                       |                          |                        |                            |                          | X                            |                               |                          |                      | X                          | X                                             |          |
| PHLDA1                      |                          |                        | X                          |                          | X                            |                               |                          |                      |                            |                                               |          |
| EPHA2                       | X                        |                        | X                          |                          |                              |                               |                          | X                    |                            |                                               |          |
| EGR3                        |                          |                        |                            |                          |                              |                               |                          |                      |                            |                                               |          |
| PZRL1                       | X                        |                        |                            |                          |                              |                               |                          | X                    |                            |                                               |          |
| PPF1R15A                    | X                        |                        | X                          |                          | X                            |                               |                          | X                    |                            |                                               |          |
| MAP3K8                      |                          |                        |                            |                          | X                            |                               |                          |                      |                            | X                                             |          |
| TRIB1                       |                          |                        |                            |                          |                              |                               |                          |                      |                            | X                                             |          |
| AIM1                        |                          |                        |                            |                          |                              |                               |                          |                      |                            | X                                             |          |
| DUSP1                       | X                        |                        |                            |                          | X                            |                               |                          | X                    | X                          | X                                             |          |
| HES1                        | X                        |                        |                            |                          |                              |                               |                          |                      | X                          |                                               |          |
| IER3                        | X                        |                        | X                          |                          | X                            |                               |                          | X                    | X                          | X                                             |          |
| CDKN1A                      |                          |                        | X                          |                          |                              |                               |                          |                      |                            |                                               |          |
| GDF15                       |                          | X                      |                            |                          |                              |                               |                          | X                    |                            |                                               |          |
| MCL1                        | X                        |                        | X                          |                          |                              |                               |                          |                      |                            | X                                             |          |
| NFIL3                       |                          |                        |                            |                          |                              |                               |                          |                      |                            | X                                             |          |
| NRAA2                       |                          |                        | X                          |                          | X                            |                               |                          | X                    |                            | X                                             |          |
| STAT3                       |                          |                        |                            |                          |                              | X                             |                          |                      |                            |                                               |          |
| TRIO                        |                          |                        | X                          |                          |                              |                               |                          |                      |                            |                                               |          |
| NR4A1                       | X                        |                        |                            |                          | X                            |                               |                          | X                    |                            |                                               |          |
| RGS2                        |                          |                        |                            |                          |                              |                               |                          |                      | X                          |                                               |          |
| SERTAD1                     |                          | X                      |                            |                          |                              |                               |                          |                      |                            |                                               |          |
| NR4A3                       | X                        |                        |                            |                          | X                            |                               |                          |                      |                            | X                                             |          |
| TNFAIP3                     | X                        |                        | X                          | X                        | X                            | X                             |                          | X                    | X                          | X                                             |          |
| DKK1                        |                          |                        | X                          |                          |                              |                               |                          |                      |                            |                                               |          |
| PLAUR                       |                          |                        |                            |                          | X                            |                               |                          |                      | X                          | X                                             |          |
| PBEF1                       |                          |                        |                            |                          | X                            |                               |                          | X                    | X                          | X                                             |          |
| BHLHB2                      |                          |                        |                            |                          | X                            |                               |                          |                      |                            |                                               |          |
| F3                          |                          |                        |                            |                          |                              | X                             |                          |                      |                            |                                               |          |
| MAFK                        | X                        |                        |                            |                          |                              |                               |                          |                      |                            | X                                             |          |
| BCL10                       |                          |                        |                            |                          |                              |                               |                          |                      |                            |                                               |          |
| DUSP8                       |                          |                        |                            |                          | X                            |                               |                          |                      | X                          | X                                             |          |
| DUSP4                       |                          |                        | X                          |                          |                              |                               |                          | X                    |                            | X                                             |          |
| PMAP1                       |                          |                        | X                          |                          | X                            |                               |                          | X                    |                            | X                                             |          |
| SLC6A6                      |                          |                        | X                          |                          |                              |                               |                          |                      |                            |                                               |          |
| BCL3                        |                          |                        | X                          |                          |                              |                               |                          | X                    |                            | X                                             |          |
| C6orf4                      |                          |                        | X                          |                          |                              |                               |                          |                      |                            |                                               |          |
| BIRC3                       |                          |                        | X                          |                          | X                            |                               | X                        | X                    | X                          | X                                             |          |
| SLC16A3                     |                          |                        |                            |                          |                              |                               | X                        |                      |                            |                                               |          |
| CASP4                       |                          |                        |                            |                          |                              |                               |                          |                      |                            | X                                             |          |
| HRH1                        |                          |                        | X                          |                          |                              |                               |                          |                      |                            |                                               |          |
| SOC-S2                      |                          |                        |                            |                          |                              | X                             |                          |                      |                            |                                               |          |
| ADRB2                       |                          |                        |                            |                          |                              |                               |                          |                      |                            | X                                             |          |
| IFI16                       |                          |                        |                            |                          |                              |                               |                          |                      |                            | X                                             |          |
| ITGA2                       |                          |                        |                            |                          |                              |                               |                          |                      |                            |                                               |          |
| ITGA2                       | X                        |                        | X                          | X                        | X                            |                               | X                        | X                    |                            | X                                             |          |
| NFKBIA                      |                          |                        |                            |                          |                              |                               |                          |                      |                            |                                               |          |
| MGC4677                     |                          | X                      |                            |                          |                              |                               |                          |                      | X                          | X                                             |          |
| CREM                        |                          |                        |                            |                          |                              |                               |                          |                      |                            | X                                             |          |
| ETS2                        |                          |                        |                            |                          |                              |                               |                          |                      |                            | X                                             |          |
| THBS1                       | X                        |                        | X                          |                          |                              |                               |                          |                      | X                          | X                                             |          |
| EMP1                        |                          |                        | X                          |                          |                              |                               |                          |                      |                            | X                                             |          |
| GFPT2                       |                          |                        | X                          |                          |                              |                               |                          |                      |                            |                                               |          |
| KLF2                        |                          |                        | X                          |                          |                              |                               |                          |                      |                            |                                               |          |
| LDLR                        | X                        |                        |                            |                          |                              | X                             |                          |                      |                            |                                               |          |
| RHOB                        |                          |                        | X                          |                          |                              |                               |                          |                      |                            |                                               |          |
| FOSL2                       |                          |                        |                            |                          | X                            |                               |                          |                      |                            | X                                             |          |
| JRF1                        | X                        |                        | X                          |                          | X                            | X                             |                          | X                    |                            | X                                             |          |
| HSPB8                       |                          | X                      |                            |                          |                              |                               |                          |                      | X                          | X                                             |          |
| LIF                         |                          |                        | X                          |                          |                              |                               | X                        | X                    |                            | X                                             |          |
| UGCG                        |                          |                        |                            |                          | X                            |                               |                          |                      |                            |                                               |          |
| PPAP2B                      |                          |                        |                            |                          | X                            |                               |                          |                      |                            | X                                             |          |
| DUSP9                       |                          |                        |                            |                          |                              |                               |                          |                      |                            | X                                             |          |
| SDC4(Ryndocan core protein) | X                        |                        | X                          |                          | X                            |                               |                          | X                    | X                          | X                                             |          |
| RIS1                        |                          |                        | X                          |                          |                              |                               |                          |                      | X                          |                                               |          |
| SGK                         |                          |                        |                            |                          |                              |                               | X                        |                      |                            |                                               |          |
| MT2A                        |                          |                        |                            |                          |                              |                               |                          |                      |                            | X                                             |          |
| STC2                        |                          |                        | X                          |                          |                              |                               |                          |                      |                            |                                               |          |
| CEBPG                       |                          |                        |                            |                          |                              | X                             |                          |                      |                            | X                                             |          |
| B4GALT5                     |                          |                        |                            |                          | X                            |                               |                          |                      | X                          |                                               |          |
| FGF2                        |                          |                        | X                          |                          |                              |                               |                          |                      |                            |                                               |          |
| THBD                        |                          |                        |                            |                          |                              |                               |                          | X                    |                            |                                               |          |
| WNT5A                       |                          |                        |                            |                          |                              |                               |                          |                      |                            | X                                             |          |

[illegible]
